# Supplementary material for: Lanthanide complexes bearing a bioinspired Cu II binding site with picomolar affinity: synthesis, structural, relaxometric and luminescence studies
Source: Royal Society of Chemistry journal article supplement (doi:10.1039/d5dt01735a), 2025-01-01
Supplement: d5dt01735a1.pdf [file d5dt01735a1.pdf]

## Supporting Information for

### Lanthanide complexes bearing a bioinspired Cu<sup>II</sup>-binding site with picomolar affinity: synthesis, structural, relaxometric and luminescence studies

Katharina Zimmerer<sup>a</sup>, Bertrand Vilen<sup>a</sup>, Agnès Pallier<sup>b</sup>, Carlos Platas-Iglesias<sup>c</sup>, Peter Faller<sup>a,d</sup>, Célia S. Bonnet<sup>b\*</sup>, Angélique Sour<sup>a\*</sup>

<sup>a</sup>Institut de Chimie (UMR 7177), Université de Strasbourg – CNRS, 4 Rue Blaise Pascal, 67000 Strasbourg, France.

<sup>b</sup>Centre de Biophysique Moléculaire, Université d'Orléans, Orléans, France

<sup>c</sup>Departamento de Química Fundamental, Universidade da Coruña, Campus da Zapateira, Rúa da Fraga 10, 15008 A Coruña, Spain.

<sup>d</sup>Institut Universitaire de France (IUF), 1 rue Descartes, 75231 Paris, France.  
celia.bonnet@cnrs-orleans.fr ; a.sour@unistra.fr

#### 1. Synthesis

##### 1.1 Synthesis of DO3A-C3AmpicH and the corresponding lanthanide complexes

##### 1.2 Synthesis of C3AmpicH

#### 2. Characterization

##### 2.1. Material and methods

##### 2.2. $q$ -number determination by luminescence spectroscopy

##### 2.3. Characterization of the Cu<sup>II</sup> binding

##### 2.4. pH-dependent Cu<sup>II</sup>-coordination

##### 2.5. Competition experiments

##### 2.6. Selectivity over other metal ions

##### 2.7. Equations used for the fitting of the <sup>1</sup>H NMRD profiles

##### 2.8. DFT calculations

## 1. Synthesis

**Reagents:** All reagents were purchased from commercial sources and used without further purification. Diisopropyl ethylamine (DIEA), triethyl amine (TEA), piperidine, acetic anhydride, trifluoroacetic acid (TFA), triisopropyl silane (TIS), Fmoc-His(Trt)-OH, tri-tert-butyl 2,2',2''-(1,4,7,10-tetraazacyclododecane-1,4,7-triyl)triacetate (DO3AtBu), 1-[bis(dimethylamino)methylene]-1H-1,2,3-triazolo[4,5-b]pyridinium 3-oxide hexafluorophosphate (HATU), *N,N'*-diisopropylcarbodiimide (DIC), Oxyma Pure, 1,8-diazabicyclo[5.4.0]undec-7-ene (DBU), pyridine-2,6-dicarboxylic acid, ethyltrifluoroacetate, pyropylamine hydrochloride, 3-bromopropylamine hydrobromide, 2,4,6-trinitrobenzene-1-sulfonic acid (TNBS). Rink Amide MBHA resin (100-200 mesh, 0.7 mmol/g) was purchased from Iris Biotech.

**Solid phase peptide synthesis (SPPS)** was performed on a Rink Amide AM resin (100-200 mesh, loading 0.70 mmol/g) on a 0.1 mmol reaction scale. All steps were carried out in a syringe with a filter frit under continuous shaking on a CAT shaking device at room temperature. The resin was swelled in DCM for 20 min, then in DMF for 15 min. Fmoc deprotection was performed 4 times using 5 mL of a solution of 20% piperidine in DMF each time. The coupling of Fmoc-His(Trt) was performed for 1 hour using 2 eq. of the amino acid, 1.9 eq. HBTU, 4 eq. DIEA in 3-10 mL DMF. The conditions of the coupling steps involving pyridine-2,6-dicarboxylate are described in detail below. TNBS test was performed after the coupling steps to evaluate if they have been complete. Capping of unreacted amines was performed using a solution of 5% acetic anhydride and 10% DIEA in DMF (5 min). The Fmoc deprotection was followed by UV-Vis absorption spectroscopy ( $\epsilon_{301\text{nm}} = 7800 \text{ M}^{-1}\text{s}^{-1}$ ). Before the cleavage, the resin was washed three times each with DMF, DCM and diethyl ether and dried. Cleavage from the resin and removal of the protecting groups were performed using a solution of TFA / TIS / H<sub>2</sub>O (95/2.5/2.5) (3 x 3 mL for 30 min). TFA was removed by evaporation, the crude was solubilized in ACN/ H<sub>2</sub>O and lyophilized.

**NMR spectra** were recorded on Bruker AVANCE 300, 500 spectrometers in deuterated solvents (CDCl<sub>3</sub> and MeOD-d<sub>4</sub>). The peak of the solvent was used as a reference and the chemical shifts are given in parts per million (ppm) and *J* values in Hertz (Hz). The multiplicity of the signals is abbreviated as followed: singlet (s), doublet (d), triplet (t), doublet of doublets (dd), triplet of quartets (tq), doublet of doublets of doublets (ddd). Broad signals are indicated by broad (br.). The attribution of the signals was performed with the help of 2D spectra (<sup>1</sup>H-<sup>1</sup>H COSY, HSQC and HMBC) for the end products and by analogy for the intermediates.

**Mass spectrometry (MS):** LC-MS analysis was carried out on a Agilent 1100 Series LC-system with a XBridge® Peptide BEH C18 Column (300 Å, 3.5 µm, 4.6 mm x 150 mm, 1/pkg) combined with an Agilent 6120 Quadrupol mass detector or on a Thermo Scientific Accela UHPLC with a Hypers II GOLD C18 column (50 x 2.1 mm<sup>2</sup>, 1.9 µm) combined with a Thermo Scientific LCQ Fleet ion-trap. HR-MS analysis was carried out in the mass service of the chemistry faculty on a ORBITRAP HR-MS (ThermoFisher) with electrospray ionization or on a MALDI Autoflex II TOF/TOF (Bruker).

**HPLC:** Purification was performed on preparative HPLC (XBridge Peptide BEH C18 OBD Prep Column from Waters, 19 mm x 150 mm, pore size 130 Å, particle size 5 µm) and a flow rate of 1 mL/min, using H<sub>2</sub>O + 0.1% TFA (Eluent A) and 0.1% TFA in 90% ACN, 10% H<sub>2</sub>O (Eluent B) as eluents. UV-Vis detection was carried out at 214 and 254 nm.

**Salt exchange** was performed using a 2 mM aqueous HCl solution followed by lyophilization. This process was repeated 3 to 4 times to ensure thorough exchange. The volume of the HCl solution added was chosen to ensure an excess of HCl relative to the TFA counterions in the sample.

## 1.1 Synthesis of DO3A-C3AmpicH and the corresponding lanthanide complexes

### N-(3-Bromopropyl)-2,2,2-trifluoroacetamide **1**

Compound **1** was synthesized following the protocol described by Seibel and coll.<sup>1</sup> It was used for the next step without column chromatography purification.

### Compound **2**

Compound **1** (351 mg, 1.5 mmol, 1 eq), DO3AtBu (643 mg, 1.25 mmol, 0.83 eq.) and K<sub>2</sub>CO<sub>3</sub> (518 mg, 3.75 mmol, 2.5 eq.) were dissolved in anhydrous ACN (6 mL) and stirred at 70°C under argon atmosphere for 24 h. The reaction progress was controlled by LC-MS analysis. After cooling to room temperature, K<sub>2</sub>CO<sub>3</sub> was removed by filtration and the solvents were removed by evaporation. The crude was then purified by silica gel chromatography (eluted with a gradient of MeOH (2-20%) in DCM containing 2% aqueous NH<sub>3</sub>) to give 405 mg (49%) of compound **2**.

<sup>1</sup>H-NMR (CDCl<sub>3</sub>, 300 MHz) δ 1.6-3.5 (m, 28 H, CH<sub>2</sub>) 1.42-1.47 m, 27 H, C(CH<sub>3</sub>)<sub>3</sub> ppm.

LC-ESI-MS: m/z for [M+H]<sup>+</sup>: calcd. 668.41, found: 668.20.

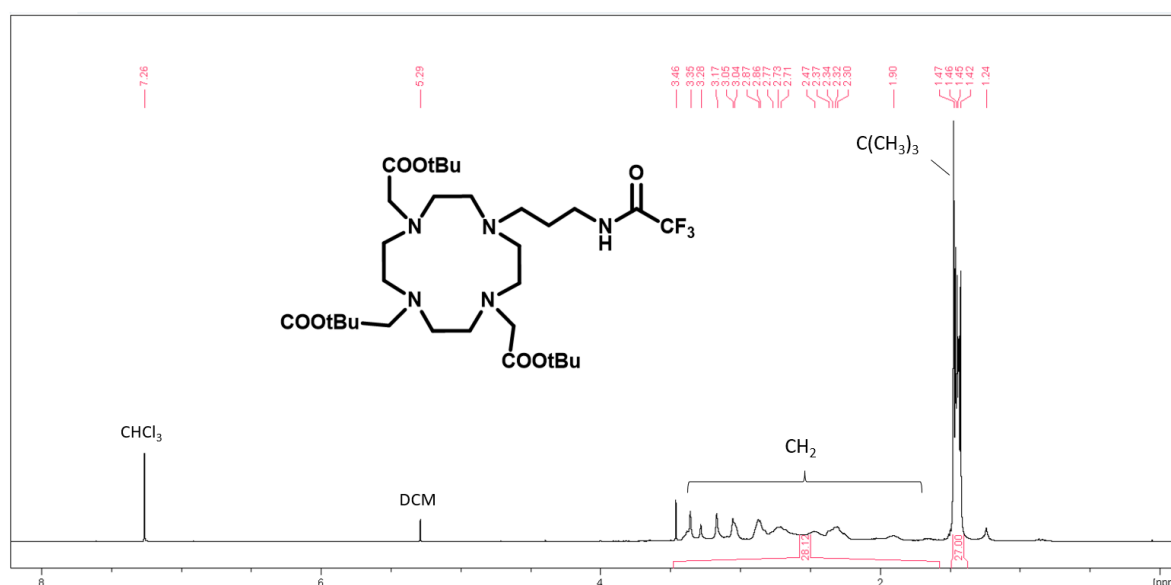

Figure S1: <sup>1</sup>H-NMR spectrum of compound **2** (300 MHz, CDCl<sub>3</sub>).

### Compound **3**

To a solution of compound **2** (248 mg, 0.37 mmol, 1 eq) in EtOH (7.5 mL) was added an aqueous NaOH solution (2.5 mL, 0.3 M) and the mixture was stirred at room temperature for 5 h. After evaporation of the solvents, the product was solubilized in DCM (10 mL) and washed with an aqueous NaOH solution (pH 12, 3 times, 3 mL). The organic phase was dried over Na<sub>2</sub>SO<sub>4</sub> and evaporated. The reaction was considered quantitative (211 mg).

<sup>1</sup>H-NMR (CDCl<sub>3</sub>, 300 MHz) δ: 8.24 (s, 2H, NH<sub>2</sub>), 2.6-3.3 (m, 26 H, CH<sub>2</sub>), 1.60 (m, 2 H, CH<sub>2</sub>), 1.42-1.44 (m, 27 H, C(CH<sub>3</sub>)<sub>3</sub>) ppm.

LC-ESI-MS: m/z for [M+H]<sup>+</sup> calcd: 572.43, found: 572.22.

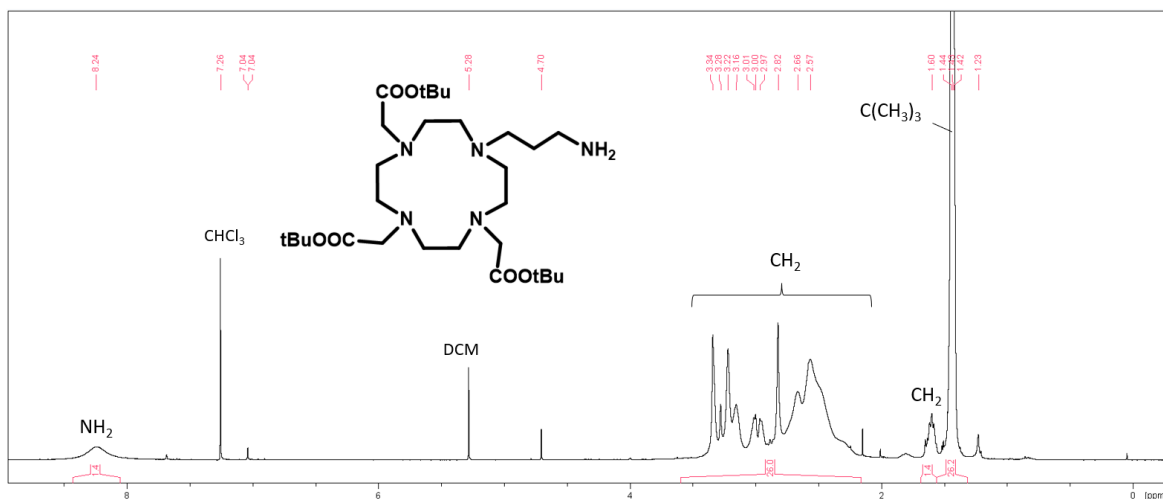

**Figure S2:**  $^1\text{H}$ -NMR spectrum of compound **3** (300 MHz,  $\text{CDCl}_3$ ).

#### Compound **4**

To a solution of pyridine-2,6-dicarboxylate (187 mg, 1.12 mmol, 4 eq.) in DMF (3 mL), Oxyma Pure (80 mg, 0.56 mmol, 2 eq.) and DIC (87  $\mu\text{L}$ , 0.56 mmol, 2 eq.) were added. After 2 min, this solution was added to compound **3** (159 mg, 0.28 mmol, 1 eq.) and the resulting dark yellow suspension was stirred at room temperature for 3 days. After removal of the DMF, the crude was purified by silica gel chromatography (eluted with a gradient of MeOH (2-20%) in DCM containing 2% aqueous  $\text{NH}_3$ ). As the separation of the starting compound **3** from the product **4** turned out to be very difficult, the crude (271 mg) was engaged in the next step without further purification. The NMR spectrum shows thus a mixture (approximately 1:1) of **3** and **4**. The yield of the reaction is estimated to be between 40-50%.

**LC-ESI-MS:**  $m/z$  for  $[\text{M}+\text{H}]^+$  calcd: 721.44, found: 721.33.

#### Compound **DO3A-C3AmpicH**

The synthesis of **DO3A-C3AmpicH** was carried out on Rink amide AM resin on a 0.1 mmol scale. Fmoc-His(Trt)-OH was attached to the resin following the standard SPPS protocol. The following coupling step with **4** (216 mg, 0.3 mmol, 3 eq.) was performed using the activator HATU (99 mg, 0.26 mmol, 2.6 eq.) and the base DIEA (105  $\mu\text{L}$ , 0.6 mmol, 6 eq.) in DMF (2.5 mL). The reaction was carried out for 24 h at RT. Since the TNBS test indicated that the reaction was not complete, the reaction was repeated for an additional 24 hours using a fresh solution of compound **4**, activator and base. After cleavage from the resin and evaporation of the TFA, purification was performed on preparative RP-HPLC (5% eluent B: isocratic for 3 min, 5-15% in 8 min, 2 min isocratic at 15% B). The product was obtained in 50 % yield with over 95% purity (34 mg).

**$^1\text{H}$  NMR** ( $\text{CD}_3\text{OD}$ , 500 MHz)  $\delta$  8.74 (br. s, 1 H, Im-H1), 8.25 (dd,  $J=1.2$  Hz,  $J=7.8$  Hz, 1H, Pyr-H3 or Pyr-H5), 8.18 (dd,  $J=0.9$  Hz,  $J=7.8$  Hz, 1H, Pyr-H3 or Pyr-H5), 8.10 (dd,  $J=7.8$  Hz,  $J=7.8$  Hz, 1H, Pyr-H4), 7.42 (br. s, 1H, Im-H2), 5.03 (dd,  $J=5.2$  Hz,  $J=9.4$  Hz, 1H, CH), 4.09 (br. s, 2H,  $\text{CH}_2$ ), 3.74-2.97 (m, 28H,  $\text{CH}_2\text{s}$ ), 2.29-2.11 (m, 2H,  $\text{CH}_2$ ) ppm.

**$^{13}\text{C}$  NMR** ( $\text{CD}_3\text{OD}$ , 125 MHz)  $\delta$  174.9 and 174.7 (Amide-His), 166.2 and 165.8 (Amide-pic), 150.2 and 149.7 (Pyr-C), 140.5 (Pyr-CH4), 134.8 (Im-H1), 131.8 (Im-C), 126.3 (Pyr-CH3 and Pyr-CH5), 118.5 (Im-CH2), 55.6 ( $\text{CH}_2$ ), 54.1 ( $\text{CH}_2$ ), 54.1 ( $\text{CH}_2$ ), 53.5 (CH), 53.1 ( $\text{CH}_2$ ), 51.3 ( $\text{CH}_2$ ), 50.2 ( $\text{CH}_2$ ), 50.1 ( $\text{CH}_2$ ), 49.6 ( $\text{CH}_2$ ), 49.5 ( $\text{CH}_2$ ), 49.3 ( $\text{CH}_2$ ), 49.1 ( $\text{CH}_2$ ), 48.9 ( $\text{CH}_2$ ), 37.9 ( $\text{CH}_2$ ), 28.0 ( $\text{CH}_2$ -1), 25.1 ( $\text{CH}_2$ ) ppm.

The signals of the quaternary carbons of the DOTA carboxylic acids are not visible in the  $^{13}\text{C}$ -NMR, longer acquisition times would have been necessary.

**HR-ESI-MS:** m/z for [M+K]<sup>+</sup>: calcd: 689.3365, found: 689.3379.

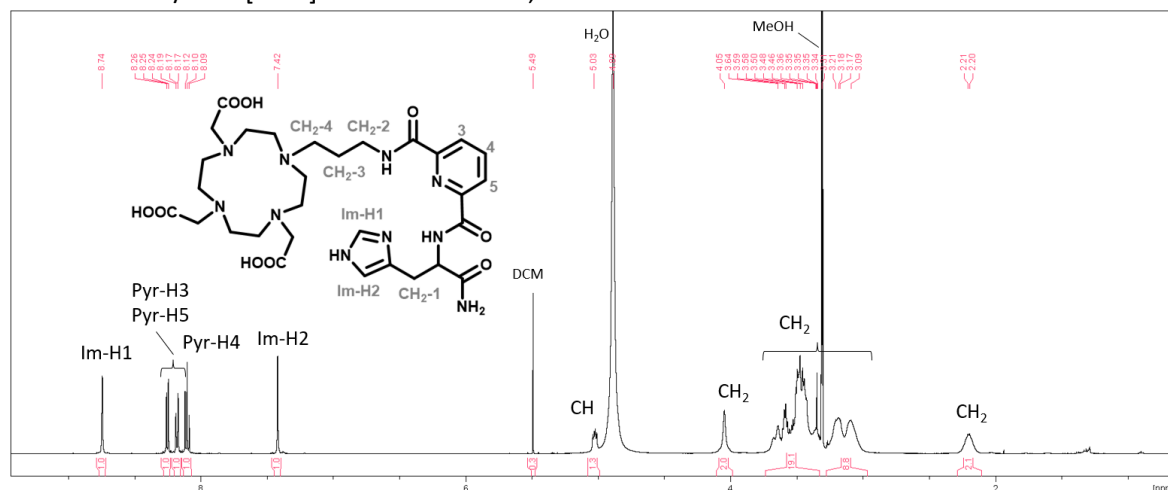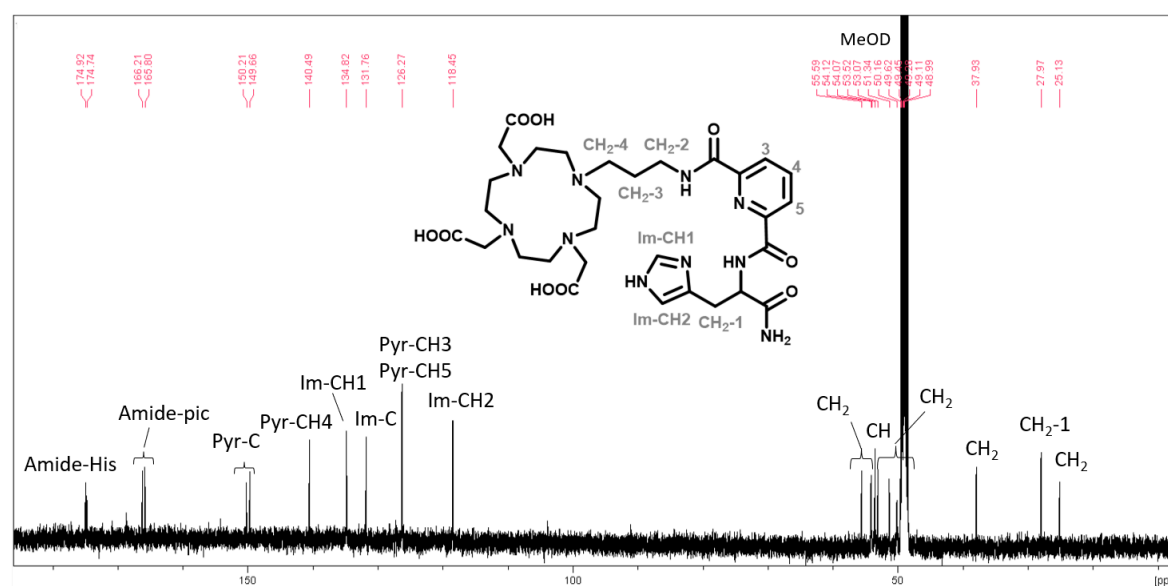

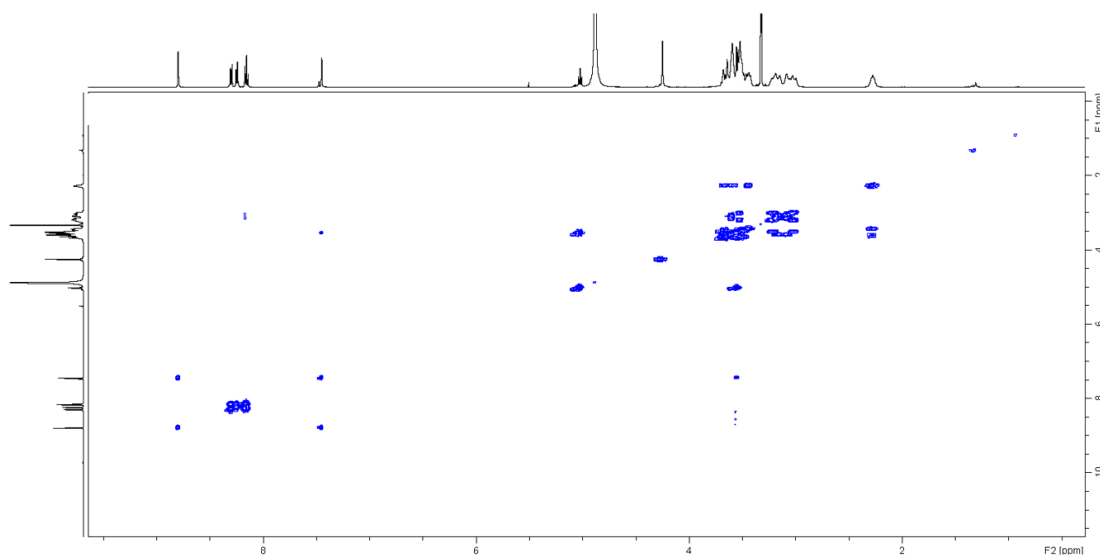

**Figure S5:**  $^1\text{H}$   $^1\text{H}$ -COSY spectrum of DO3A-C3AmpicH (500 MHz,  $\text{CD}_3\text{OD}$ ).

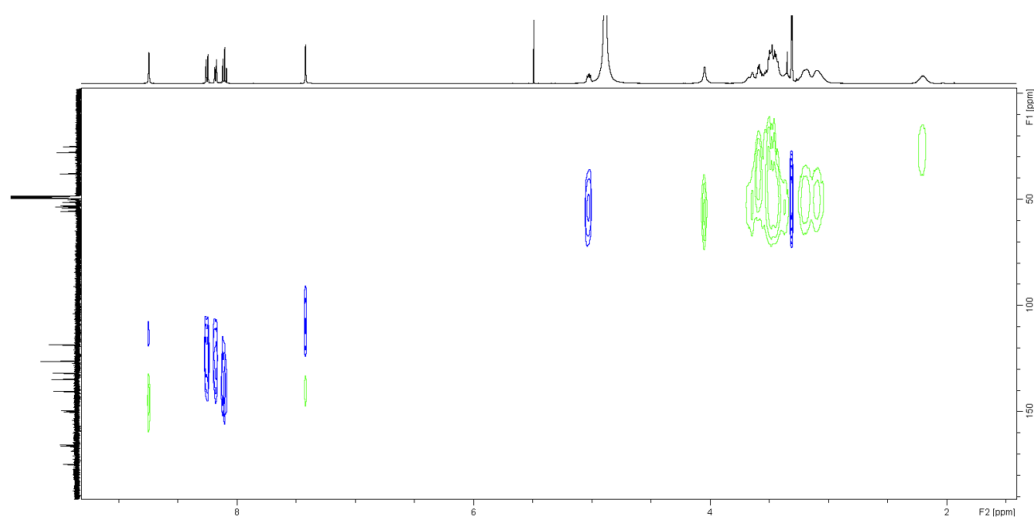

**Figure S6:** HSQC spectrum of DO3A-C3AmpicH (500 / 125 MHz,  $\text{CD}_3\text{OD}$ ).

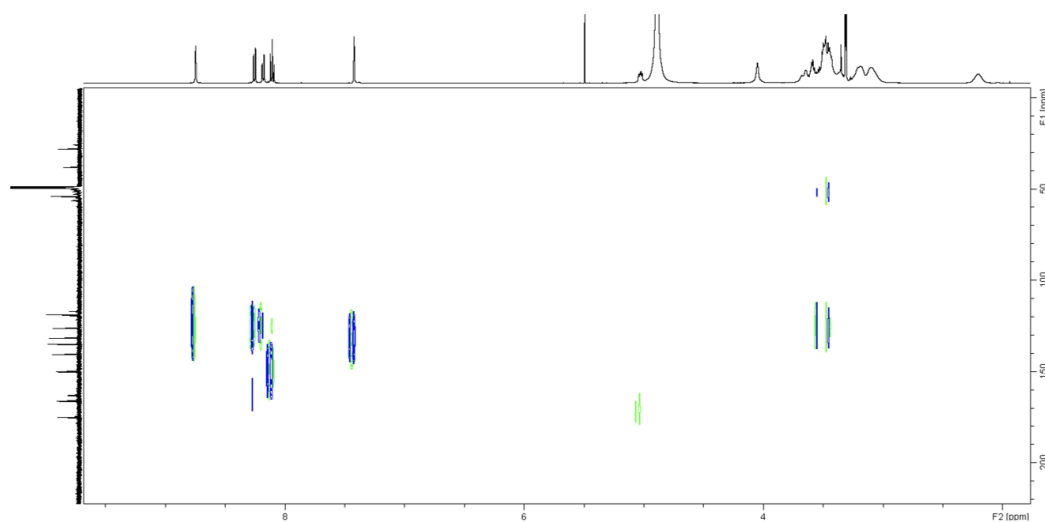

**Figure S7:** HMBC spectrum of DO3A-C3AmpicH (500 / 125 MHz,  $\text{CD}_3\text{OD}$ ).

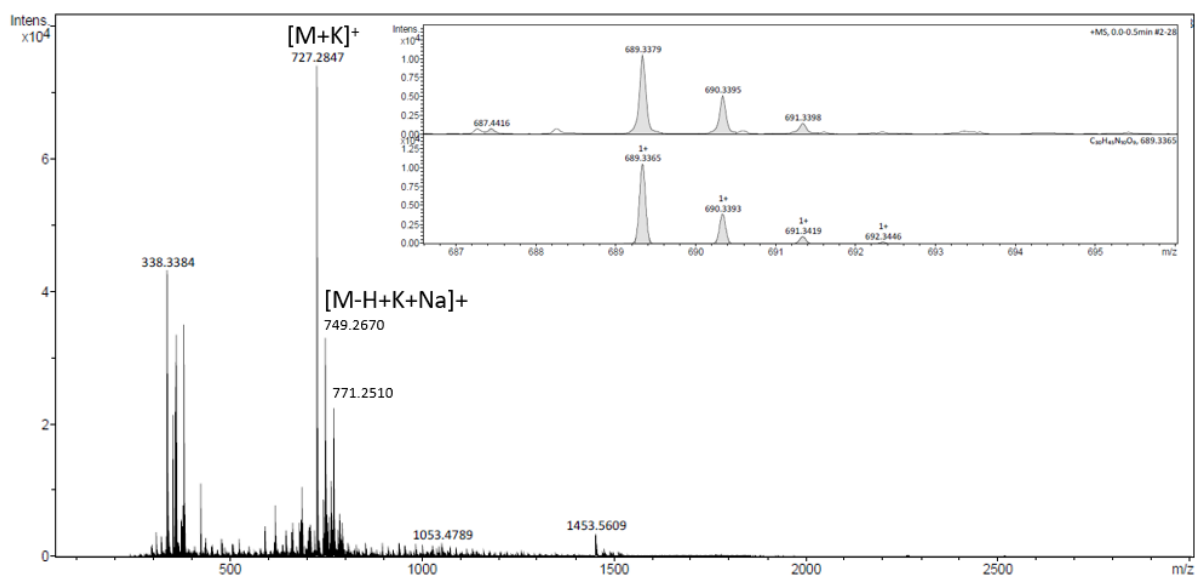

**Figure S8a:** HR-ESI-MS spectrum of DO3A-C3Ampich.

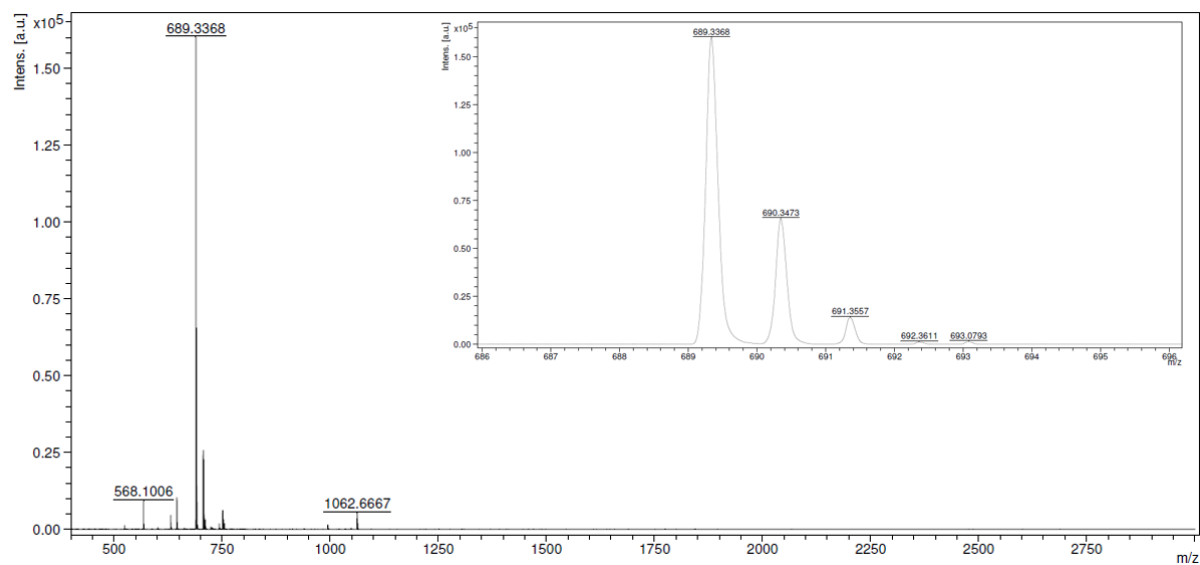

**Figure S8b:** MALDI TOF MS spectrum of DO3A-C3Ampich.

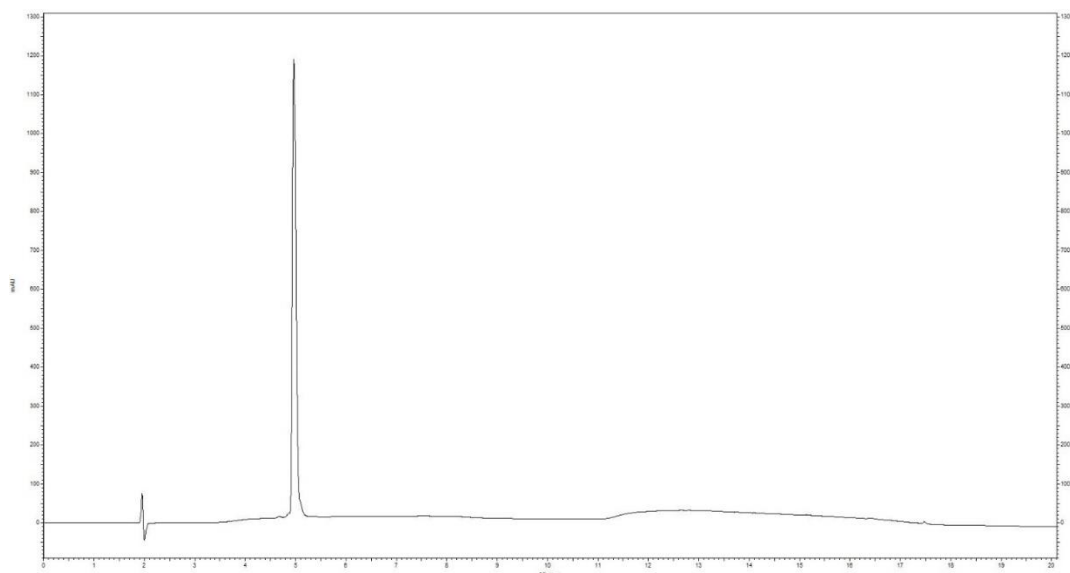

**Figure S9:** RP-HPLC of DO3A-C3AmpicH. Gradient: 5-22% eluent B in 5 min, plateau at 22% for 3 min, 22-100% in 7 min.

### Lanthanide complexes

**The formation of the lanthanide complexes** was performed by the stepwise addition of  $\text{EuCl}_3$  or  $\text{GdCl}_3$  to the ligand, adjusting the pH between 5.0 and 6.5 with NaOH and HCl, and incubation at 40-50°C for a minimum of 3 hours. The presence of free  $\text{Gd}^{\text{III}}$  or  $\text{Eu}^{\text{III}}$  was assessed using Xylenol Orange. 5  $\mu\text{L}$  of the complex solution was mixed with 700  $\mu\text{L}$  of urotropine buffer (100 mM, pH 5.8, pH adjusted with NaOH) and 10  $\mu\text{L}$  of Xylenol Orange solution (3 mg/mL, pH 5.8, pH adjusted with NaOH). The appearance of a purple colour indicated the presence of free lanthanide ions. Positive and negative controls were carried out for comparison. If no free lanthanide ions were detected, an additional aliquot of the lanthanide solution was added. In the opposite case, more ligand solution was added and the incubation and Xylenol Orange assay were repeated until maximum ligand complexation was achieved without excess free lanthanide ions. This method ensures that a maximum of 5% of free ligand is present in the sample. The concentrations of  $\text{Ln}^{\text{III}}$ -containing solutions were also checked by ICP-OES (Inductively Coupled Plasma Optical Emission Spectrometry) or BMS (bulk magnetic susceptibility) measurements when possible.

### HR-ESI-MS :

For Gd-DO3A-C3AmpicH:

$m/z$  for  $[\text{M}+\text{H}]^+$ : calcd. 844.2372, found: 844.2369.

$m/z$  for  $[\text{M}+2\text{H}]^{2+}$ : calcd. 422.6222, found: 422.6254.

For Eu-DO3A-C3AmpicH:

$m/z$  for  $[\text{M}+\text{H}]^+$ : calcd. 839.2344, found: 839.2344 (same value).



ThermoFisher Orbitrap: Exactive Plus with Extend Mass Range: Source HESI II Ion Polarity: Positive  
Analysis Name: I20250821-04

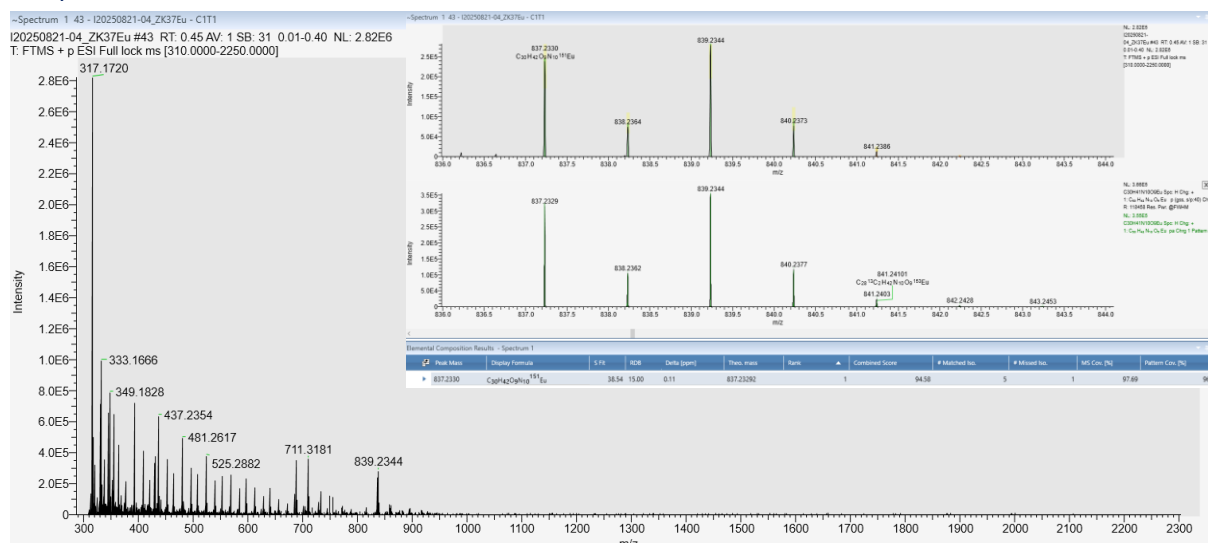

**Figure HRMS Eu:** HR-ESI-MS spectrum of Eu-DO3A-C3AmpicH.

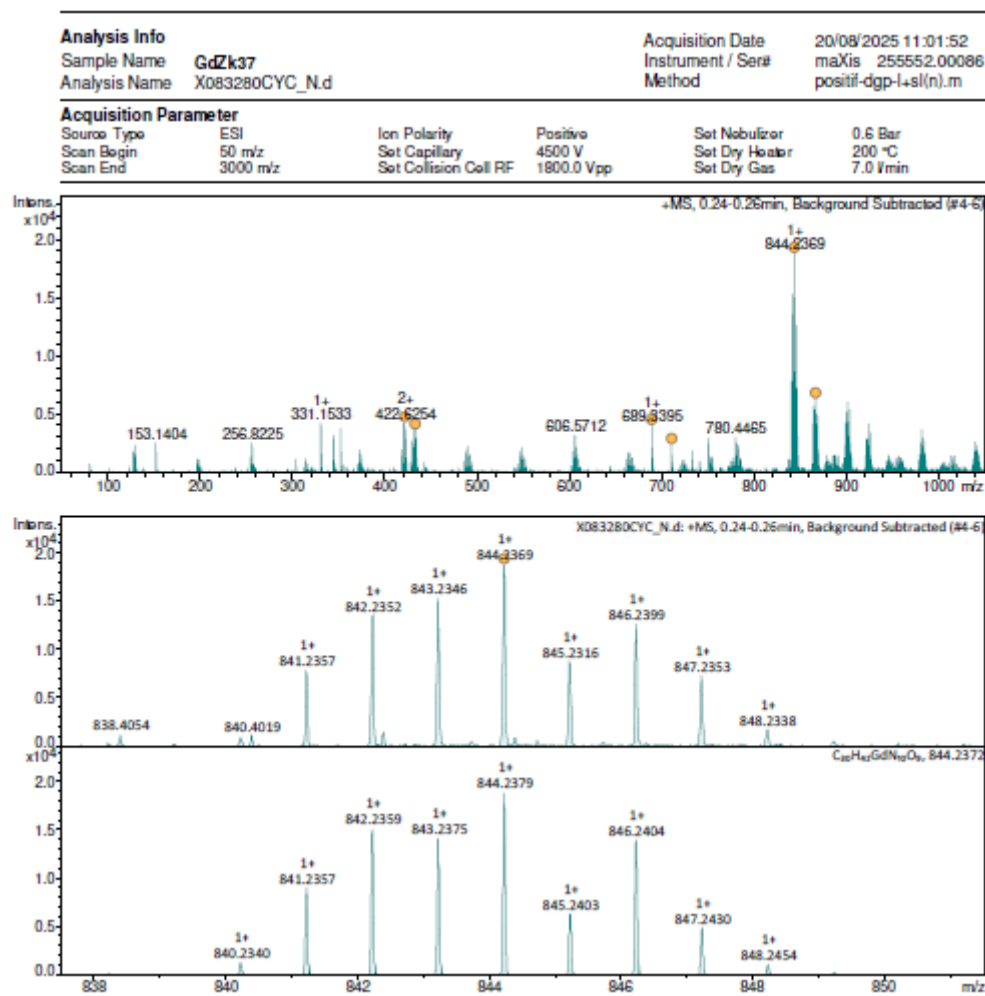

**Figure HRMS Gd:** HR-ESI-MS spectrum of Gd-DO3A-C3AmpicH.

## 1.2 Synthesis of C3AmpicH

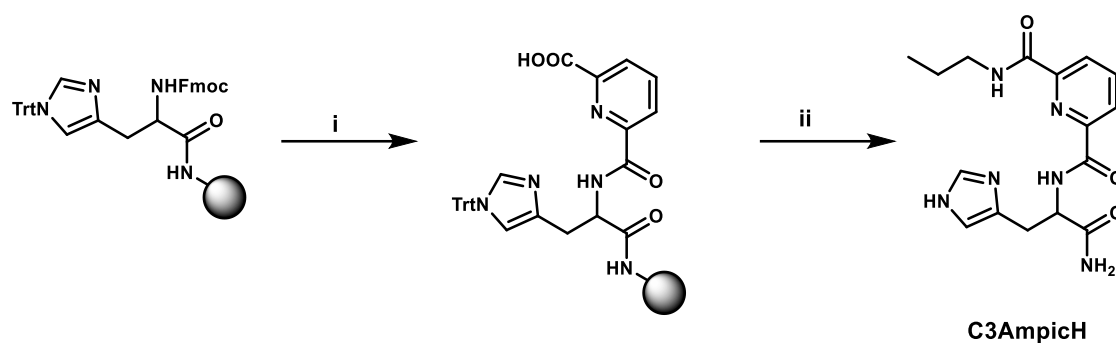

**Scheme S1:** Synthesis scheme of C3-AmpicH. Conditions: **i)** 1 eq. DIC, 1 eq. Oxyma Pure, 2 eq. pyridine-2,6-dicarboxylic acid, DMF, RT, 3 h. **ii)** 1) 4 eq. propylamine hydrochloride, 1 eq. DIC, 1 eq. Oxyma Pure, DMF, 4 eq. DBU, (3 x 3-4 h), 2) TFA/TIS/H<sub>2</sub>O: 95/2.5/2.5, 3 x 30 min. The grey spheres symbolize the Rink Amide AM resin.

The ligand C3AmpicH was synthesized on Rink amide AM resin on a 0.1 mmol scale (143 mg, loading: 0.70 mmol/g). The coupling step between pyridine-2,6-dicarboxylic acid and the histidine on the resin was performed using pyridine-2,6-dicarboxylic acid (33 mg, 0.2 mmol, 2 eq.), DIC (16  $\mu$ L, 1 eq., 0.1 mmol) and Oxyma Pure (14 mg, 1 eq., 0.1 mmol) in DMF (3 mL) with a reaction time of 3 h. It has been noticed, that washing steps before this step were very important to prevent the presence of piperidine from the Fmoc deprotection solution, which could react with the second carboxylic acid of the reactant. Also, DIEA was avoided, as its use in this reaction step led to undesired side products, possibly due to the reaction of DIEA degradation products with the second carboxylic acid function. A microcleavage followed by LC-MS analysis confirmed the formation of the right intermediate. For the following coupling step with propylamine hydrochloride, the carboxylic acid on the resin was first pre-activated for 20 min with DIC (16  $\mu$ L, 0.1 mmol, 1 eq.) and Oxyma Pure (14 mg, 0.1 mmol, 1 eq.) in DMF. Then a solution of propyl amine hydrochloride (38 mg, 0.4 mmol, 4 eq.) and DBU (119  $\mu$ L, 0.8 mmol, 8 eq.) in DMF was added. This step was performed 3 times for each 3-4 h with a fresh solution at each time. After cleavage from the resin, the crude was purified by RP-HPLC using a gradient of 10-60% eluent B in 15 min. 21 mg of pure product were obtained as a white powder after salt exchange (57% yield, considering 1 Cl<sup>-</sup> counterion).

**HR-ESI-MS**  $m/z$  for [M+H]<sup>+</sup>: calcd. 345.1670, found: 345.1674.

**NMR <sup>1</sup>H** (300 MHz, CD<sub>3</sub>OD):  $\delta$  8.79 (d,  $J$  = 1.4 Hz, 1H, Im-H1), 8.29 (dd,  $J$  = 7.6 Hz,  $J$  = 1.3 Hz, 1H, Pyr-H3 or Pyr-H5), 8.24 (dd,  $J$  = 7.8 Hz,  $J$  = 1.3 Hz, 1H, Pyr-H3 or Pyr-H5), 8.14 (dd,  $J$  = 7.7 Hz,  $J$  = 7.7 Hz, 1H, Pyr-H4), 7.33 (d,  $J$  = 1.3 Hz, 1H, Im-H2), 5.02 (dd,  $J$  = 5.6 Hz,  $J$  = 8.9 Hz, 1H, CH), 3.52 (ddd,  $J$  = 15.2 Hz,  $J$  = 5.6 Hz,  $J$  = 0.8 Hz, 1H, CH<sub>2</sub>-1A), 3.43 (m, 2H, CH<sub>2</sub>-2), 3.25 (dd,  $J$  = 15.7 Hz,  $J$  = 9.0 Hz, 1H, CH<sub>2</sub>-1B), 1.70 (tq,  $J$  = 7.3 Hz,  $J$  = 7.3 Hz, 2H, CH<sub>2</sub>-3), 1.00 (t,  $J$  = 7.4 Hz, 3H, CH<sub>3</sub>) ppm.

**<sup>13</sup>C NMR** (125 MHz, CD<sub>3</sub>OD):  $\delta$  174.5 (Amide-His), 165.9 and 165.8 (2 Amide-pic), 150.5 (Pyr-C), 149.6 (Pyr-C), 140.5 (Pyr-CH), 135.0 (Im-CH1), 131.6 (Im-C), 126.2 (Pyr-CH), 126.0 (Pyr-CH), 118.3 (Im-CH2), 53.4 (CH), 42.5 (CH<sub>2</sub>-2), 28.1 (CH<sub>2</sub>-1), 23.9 (CH<sub>2</sub>-3), 11.8 (CH<sub>3</sub>) ppm.

The chemical shifts were attributed according to HSQC and HMBC spectra.

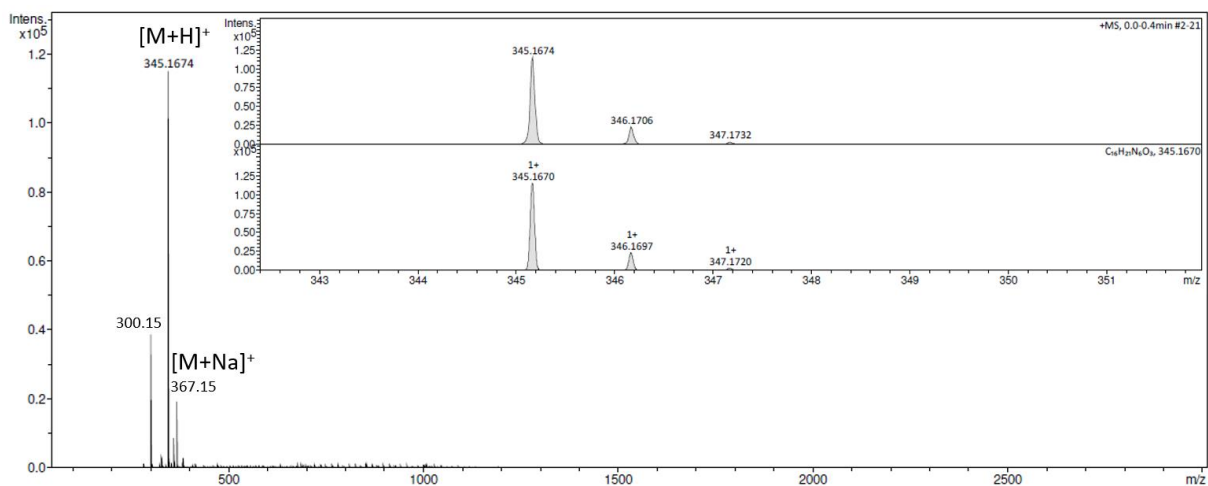

**Figure S10:** HR-ESI-MS spectrum of C3AmpicH.

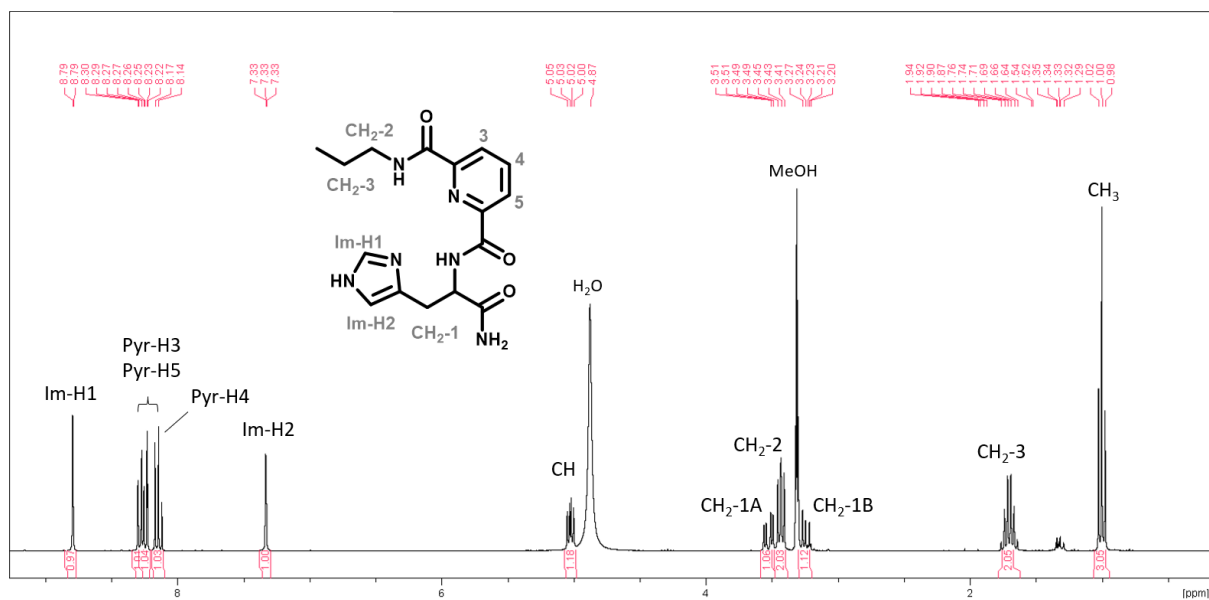

**Figure S11:**  $^1\text{H}$ -NMR spectrum of C3AmpicH (300 MHz,  $\text{CD}_3\text{OD}$ ).

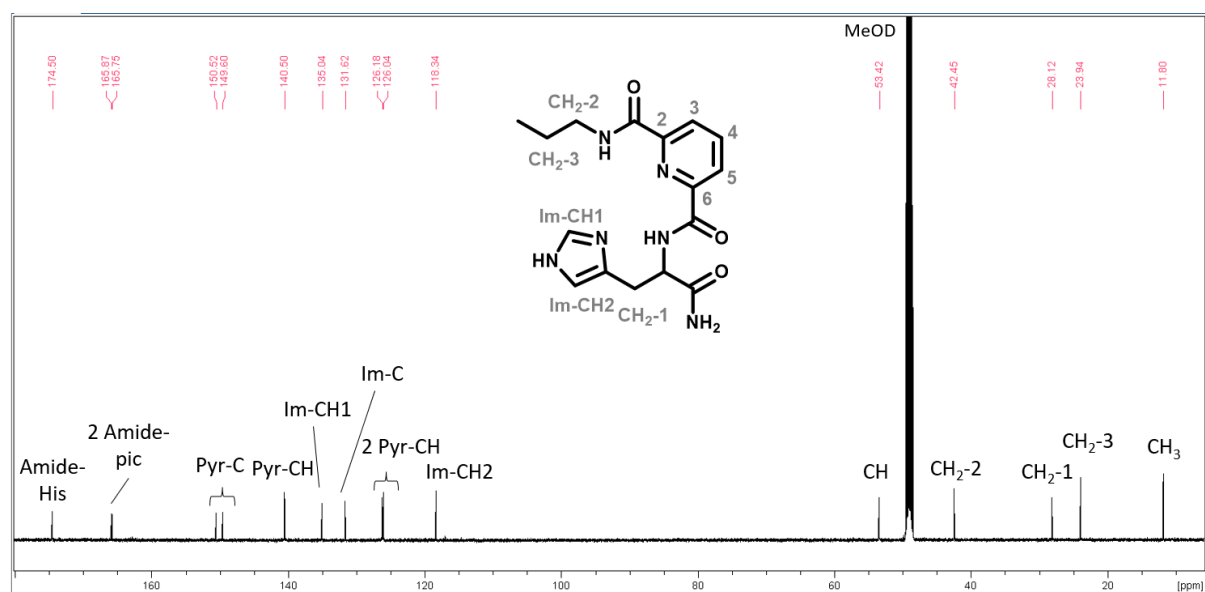

**Figure S12:** <sup>13</sup>C-NMR spectrum of C3AmpicH (125 MHz, CD<sub>3</sub>OD).

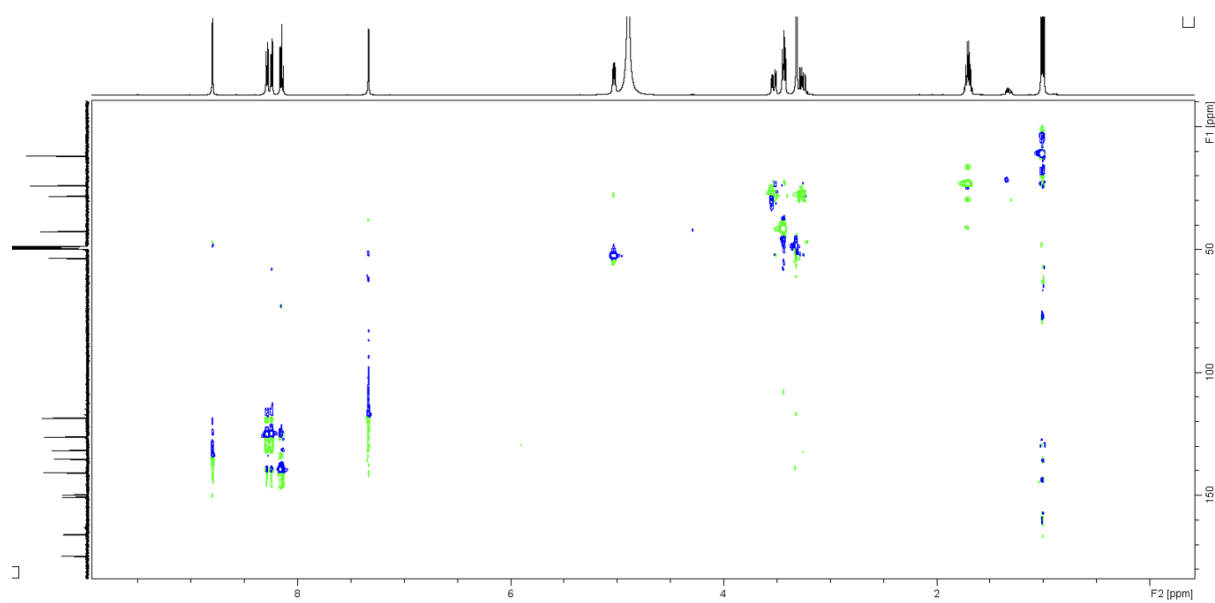

**Figure S13:** HSQC spectrum of C3AmpicH (500/125 MHz, CD<sub>3</sub>OD).

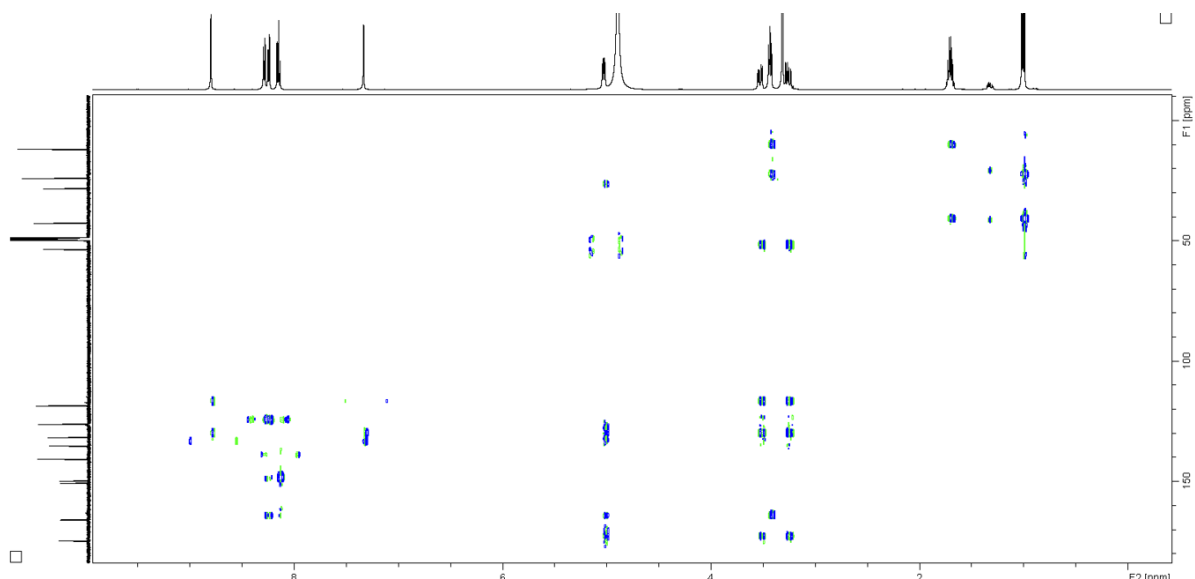

**Figure S14:** HMBC spectrum of C3AmpicH (500/125 MHz, CD<sub>3</sub>OD).

## 2. Characterization

### 2.1 Materials and Methods

#### Preparation of stock solutions:

Stock solutions of the buffers HEPES (500 mM, pH 7.4), TRIS (1 M, pH 7.4), CHES (500 mM, pH 10.0), of citric acid (200 mM), of the metal salts CuCl<sub>2</sub> (80 mM), ZnSO<sub>4</sub> (100 mM), Fe(NO<sub>3</sub>)<sub>3</sub>, MnCl<sub>2</sub>, CaCl<sub>2</sub>, MgSO<sub>4</sub> were prepared in Milli-Q water and further diluted for the different experiments. The pH of the buffers was adjusted using NaOH and HCl solutions. The concentration of the CuCl<sub>2</sub> stock solution (80 mM) was verified by UV-Vis spectroscopy considering the absorbance of the Cu<sup>II</sup> d-d band at 780 nm ( $\epsilon = 12 \text{ M}^{-1}\text{cm}^{-1}$ ) in water. The stock solutions of the Cu<sup>II</sup>-ligands DO3A-C3AmpicH (6.3 mM), C3AmpicH (9.5 mM), HSA (concentration of the ATCUN motif, 665  $\mu\text{M}$ ), aSyn<sub>46-50</sub> (2.3 mM) and A $\beta$ <sub>1-16</sub> were prepared in Milli-Q water and their concentration were determined by spectrophotometric titration with CuCl<sub>2</sub> in HEPES buffer (0.05 M, pH 7.4).

**UV-Vis absorption** spectra were recorded using 1 cm path length quartz cuvettes (either 100  $\mu\text{L}$  or 1 mL) on a Cary 60 spectrophotometer, which was equipped with either a single cell or a multicell holder. The experiments were conducted at room temperature.

**Circular dichroism (CD)** spectra were recorded in a 1 cm path cuvette with a Jasco J-810 spectropolarimeter in the 300-600 nm range using a scanning speed of 50 nm/min and 3 accumulations at room temperature. The spectra were smoothed using the Savitzky-Golay method, and the blank (buffer alone) was subtracted from each sample measurement.

**Luminescence emission and excitation** experiments were carried out on a FluoroMaX Plus spectrofluorometer (Horiba Scientific) with a 150W CW ozone-free xenon arc lamp and FluorEssence<sup>TM</sup> software in 100  $\mu\text{L}$  or 500  $\mu\text{L}$  quartz cuvettes (1 cm pathway length) at room temperature.

**q number determination:** The number of lanthanide-bound water molecules,  $q$ , has been determined by measuring the fluorescence lifetime of  $\text{Eu}^{\text{III}}$ -DO3A-C3AmpicH in both water and deuterated water. These measurements were carried out in 500  $\mu\text{L}$  quartz cuvettes (1 cm pathway length) on a Fluorolog FL3-22 (Horiba JobinYvon) fluorimeter with a pulsed Xe lamp. After the measurement in water, this solvent was lyophilized and the same measurement was carried out in  $\text{D}_2\text{O}$ . The exponential fits of the luminescence decays have been obtained with the program DAS-6, Horiba.

**Electron paramagnetic resonance (EPR) spectroscopy:** Continuous-wave EPR spectra were recorded on an EMX-plus (Bruker Biospin GmbH, Germany) X-band EPR spectrometer equipped with a high sensitivity resonator (4119HS-W1, Bruker). The  $g$  factor was calibrated in experimental conditions using the Bruker strong pitch ( $g = 2.0028$ ). The spectrometer was operated at *ca.* 9.3 GHz. The principal experimental parameters were: microwave power 0.1 mW; modulation amplitude 5 G; conversion time *ca.* 200 / 327 ms; time constant *ca.* 81 ms. 150 mT were swept in *ca.* 5 min. 4 scans were accumulated to achieve a reasonable Signal to Noise (S/N) ratio. Both samples were supplemented by 10% v/v glycerol to ensure homogeneous protein distributions. Then, samples (*ca.* 50  $\mu\text{L}$ ) were introduced to 4 mm outer diameter quartz tubes (Wilma-Labglass) and freeze-quenched into liquid nitrogen prior to their introduction into the precooled cavity (100 K, achieved by continuous flow liquid nitrogen cryostat). Experimental EPR spectra were best-simulated using labmade routines based on Easyspin toolbox under Matlab (Mathworks) environment where H strain parameter was used to account for experimental line broadening (see Stoll *et al.*).<sup>2</sup>

**Relaxometric measurements:** Proton relaxation rate ( $1/T_1$ ) measurements as a function of  $\text{Cu}^{2+}$  addition were performed at 25 °C and 60 MHz on the minispec Bruker “mqvar” relaxometer. The temperature was monitored by a Julabo CD-200F temperature control unit.  $T_1$  were measured with an inversion recovery sequence, and at least 3 reproducible measurements were performed. The experimental errors are  $\pm 5\%$ .

NMRD profiles were recorded at 1.68 mM in Hepes buffer (0.1 M, pH 7.3) on a Stelar SMARTracer fast field cycling relaxometer (0.01-10 MHz) and a Bruker WP80 NMR electromagnet adapted to variable field measurements (20-80 MHz) and controlled by a SMARTracer PC-NMR console. The temperature was monitored by a VTC91 temperature control unit and maintained by a gas flow. The temperature was determined by previous calibration with a Pt resistance temperature probe. At 400 MHz,  $1/T_1$  measurements were performed in a capillary tube placed in a 5 mm tube containing  $\text{D}_2\text{O}$  using the inversion–recovery sequence on a Bruker Avance III (400 MHz) equipped with a 5 mm BBO SmartProbe. The least-squares fit of the  $^1\text{H}$  NMRD data and simultaneous fit with the  $^{17}\text{O}$  NMR data were analyzed according to the Solomon-Bloembergen-Morgan theory of paramagnetic relaxation (see ESI<sup>†</sup>). The least-squares fitting of the data was performed using Visualizeur/Optimiseur<sup>48</sup> running on a MATLAB 8.3.0 (R2014a) platform.

## 2.2 *q*-number determination by luminescence spectroscopy

Horrocks equation:  $q = 1.11 * \left( \frac{1}{\tau_{\text{H}_2\text{O}}} - \frac{1}{\tau_{\text{D}_2\text{O}}} - 0.31 - 0.075 * n_{\text{amide bound}} \right)$

**Table S1:** Luminescence lifetimes and calculated hydration numbers of Eu<sup>III</sup>-DO3A-AmpicH. Conditions: 500  $\mu\text{M}$  Eu<sup>III</sup>-DO3A-C3AmpicH in 50 mM HEPES buffer pH 7.4. Excitation at 277 nm. For the calculation of  $q = 0.1$  the contribution of the amide bound to the lanthanide ion was considered in the equation.

| Eu <sup>III</sup> -DO3A-C3AmpicH |                  |              |
|----------------------------------|------------------|--------------|
| $\tau$ [ms]                      | D <sub>2</sub> O | 1.71         |
|                                  | H <sub>2</sub> O | 0.41<br>0.98 |
| $q$                              |                  | 1.7<br>0.1   |

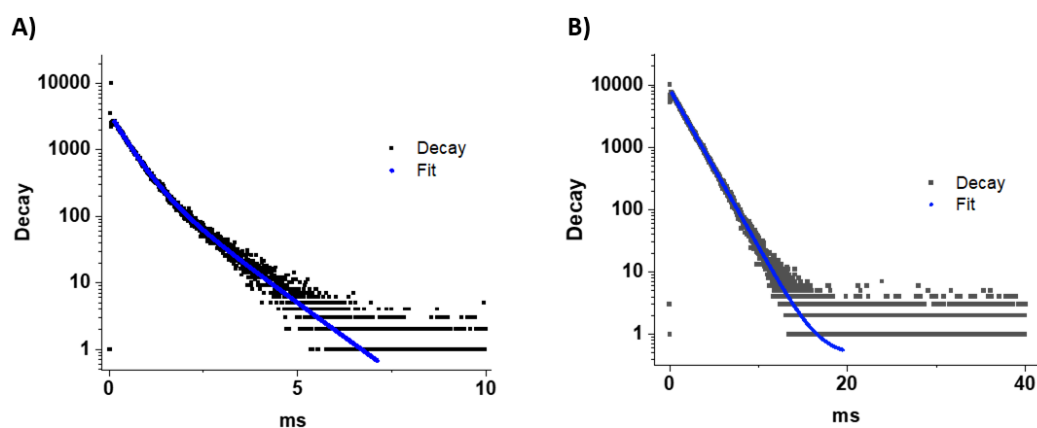

**Figure S15:** Luminescence decays and fits of Eu<sup>III</sup>-DO3A-C3AmpicH in water (A) and deuterated water (B).  $\lambda_{\text{ex}} = 277$  nm,  $\lambda_{\text{em}} = 615$  nm A) bi-exponential fit,  $t_{1/2}$ : 0.409 ms (59%) and 0.984 ms (41%), CHISQ = 0.98, B) mono-exponential fit,  $t_{1/2}$ : 1.71 ms, CHISQ = 0.99. The fits have been obtained in the program DAS-6, Horiba.

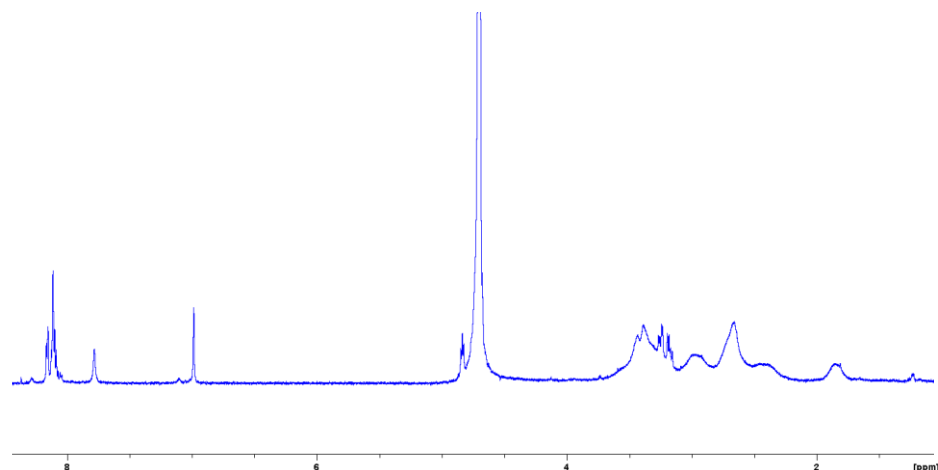

**Figure S16:** <sup>1</sup>H NMR spectra of Y<sup>III</sup>-DO3A-C3AmpicH (2.5 mM), in D<sub>2</sub>O, pD = 6.8, 25°C, 600 MHz.

**Table S2.** Best-fit parameters obtained from the fitting of the  $^1\text{H}$  NMRD profiles to the SBM theory.<sup>3</sup>

| Parameters                                    | Gd-DO3A-C3AmpicH | Gd-Cu-DO3A-pyrGH |
|-----------------------------------------------|------------------|------------------|
| $q^a$                                         | 1.9              | 2                |
| $k_{\text{ex}}^{298} (10^6 \text{ s}^{-1})^a$ | 11               | 11               |
| $\Delta H^\ddagger (\text{kJ mol}^{-1})^a$    | 33.6             | 33.6             |
| $E_R (\text{kJ mol}^{-1})$                    | $17 \pm 2$       | 18               |
| $\tau_R^{298} (\text{ps})$                    | $122 \pm 2$      | 99               |
| $E_{\text{DGH}} (\text{kJ mol}^{-1})^a$       | $41 \pm 5$       | 55 <sup>a</sup>  |
| $E_V (\text{kJ mol}^{-1})^a$                  | 1                | 1                |
| $\tau_V^{298} (\text{ps})$                    | $25 \pm 2$       | 35               |
| $\Delta^2 (10^{20} \text{ s}^{-2})$           | $0.55 \pm 0.05$  | 0.9              |

<sup>a</sup> Fixed during the fitting procedure.**Table S3:** Principal EPR parameters obtained through simulations of the EPR experimental spectra obtained with labmade scripts built with Easyspin© toolbox (Mathworks©)<sup>2</sup> g strain parameters were used to account for experimental line broadening.  $g_{\parallel}/A_{\parallel}$  ratio is given as a rough estimate of coordination for square-pyramidal  $\text{Cu}^{\text{II}}$ -geometry. While values of 110–120 are characteristic of planar complexes, 130–150 is typical of slight to moderate distortion.<sup>4</sup>

| Sample                                                 | pH  | $g_{\parallel}$<br>$\pm 0.005$ | $A_{\parallel}$<br>(MHz) | $A_{\parallel}$<br>( $\times 10^{-4} \text{ cm}^{-1}$ ) | $g_{\parallel}/A_{\parallel}$<br>(cm) |
|--------------------------------------------------------|-----|--------------------------------|--------------------------|---------------------------------------------------------|---------------------------------------|
| <b>Eu<sup>III</sup>- Cu<sup>II</sup>-DO3A-C3AmpicH</b> | 7   | 2.225                          | 510                      | 1.70E-02                                                | 131                                   |
|                                                        | 9.4 | 2.206                          | 573                      | 1.91E-02                                                | 115                                   |
| <b>Cu<sup>II</sup>-C3AmpicH</b>                        | 7.4 | 2.230                          | 510                      | 1.70E-02                                                | 131                                   |
|                                                        | 9.5 | 2.203                          | 590                      | 1.96E-02                                                | 112                                   |



## 2.3 Characterization of the Cu<sup>II</sup> binding

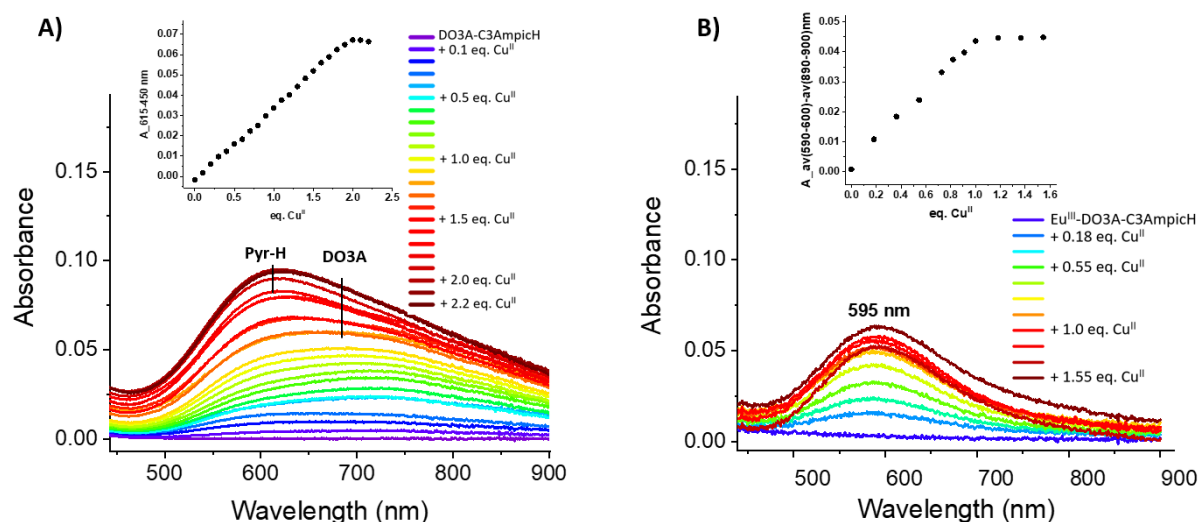

**Figure S17:** Titration of **A)** DO3A-C3AmpicH and **B)** Eu<sup>III</sup>-DO3A-C3AmpicH by Cu<sup>II</sup>. Conditions: **A)** 400  $\mu$ M DO3A-C3AmpicH, 20 mM HEPES pH 7.4, addition of 0.1 eq. Cu<sup>II</sup> per step. To monitor the evolution of the d-d band the absorbance at 615 nm has been corrected by the absorbance at 450 nm. Cu<sup>II</sup> binds in 2 binding sites: DO3A and the C3AmpicH site. Saturation is reached at 2.0 eq of CuCl<sub>2</sub>, confirming the expected 1:1 binding stoichiometry in both sites. **B)** 440  $\mu$ M Eu<sup>III</sup>-DO3A-C3AmpicH, 50 mM HEPES pH 7.4, addition of 0.18 eq. Cu<sup>II</sup> per step. To monitor the evolution of the d-d band the average absorbance between 590-600 nm has been corrected by the average absorbance between 890-900 nm. A molar absorption coefficient of 114 M<sup>-1</sup>·cm<sup>-1</sup> was calculated.

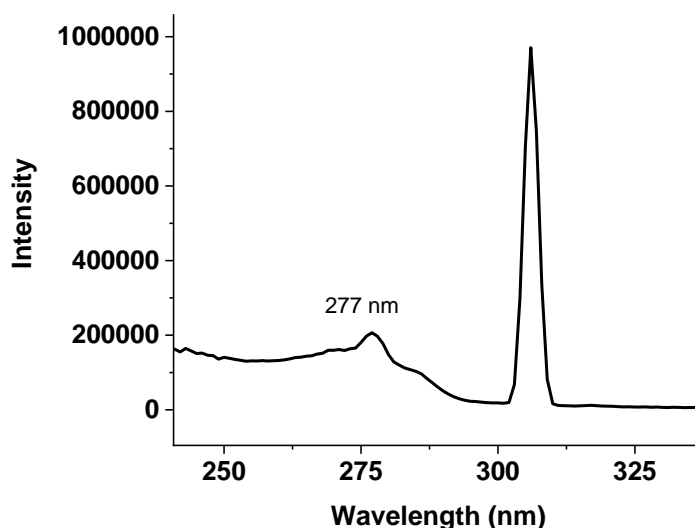

**Figure S18:** Excitation spectrum of Eu<sup>III</sup>-DO3A-C3AmpicH. Conditions: 40  $\mu$ M Eu<sup>III</sup>-DO3A-C3AmpicH, 25 mM HEPES pH 7.4,  $\lambda_{em}$  = 613 nm. The signal at 306.5 nm corresponds to the harmonic of the emission wavelength.

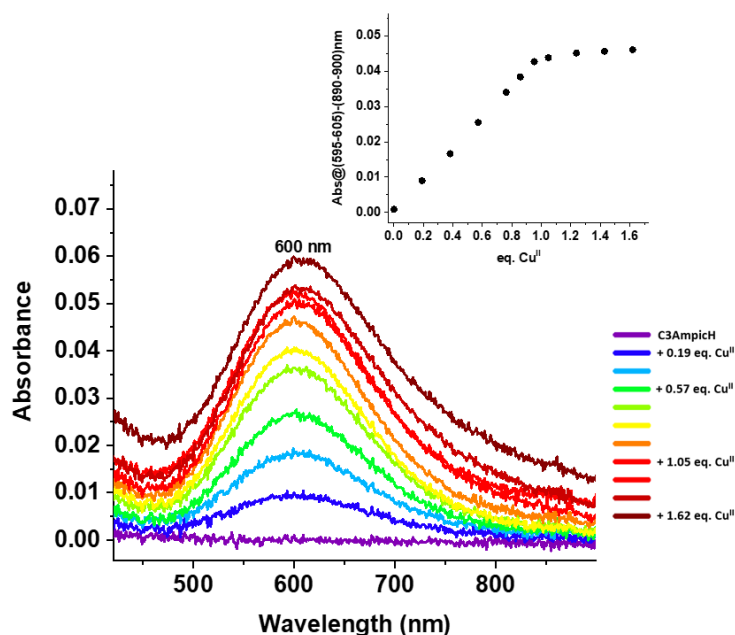

**Figure S19:** Titration of C3AmpicH with Cu<sup>II</sup>. Conditions: 420  $\mu$ M C3AmpicH, 100 mM HEPES pH 7.4 (4 repetitions). To monitor the evolution of the d-d band, the average absorbance between 595-605 nm has been corrected by the average absorbance between 890-900 nm. The maximum absorbance of the d-d band of Cu<sup>II</sup>-DO3A-C3AmpicH is at 600 nm and the molar absorption coefficient is 112 M<sup>-1</sup>·cm<sup>-1</sup>.

## 2.4. pH dependent Cu<sup>II</sup>-coordination

The influence of the pH on the Cu<sup>II</sup> coordination of Eu<sup>III</sup>-C3AmpicH and C3AmpicH has been evaluated by UV-Vis absorption spectroscopy and EPR. For both compounds a blueshift of the absorbance maximum of the d-d band of around 50 nm has been observed upon basification in UV-Vis absorption spectroscopy. (ca. 630  $\rightarrow$  580 nm). The results suggest that above pH 8 a 4N Cu<sup>II</sup>-coordination is predominant, whereas at pH-values below 6 it is a 3N1O-coordination.

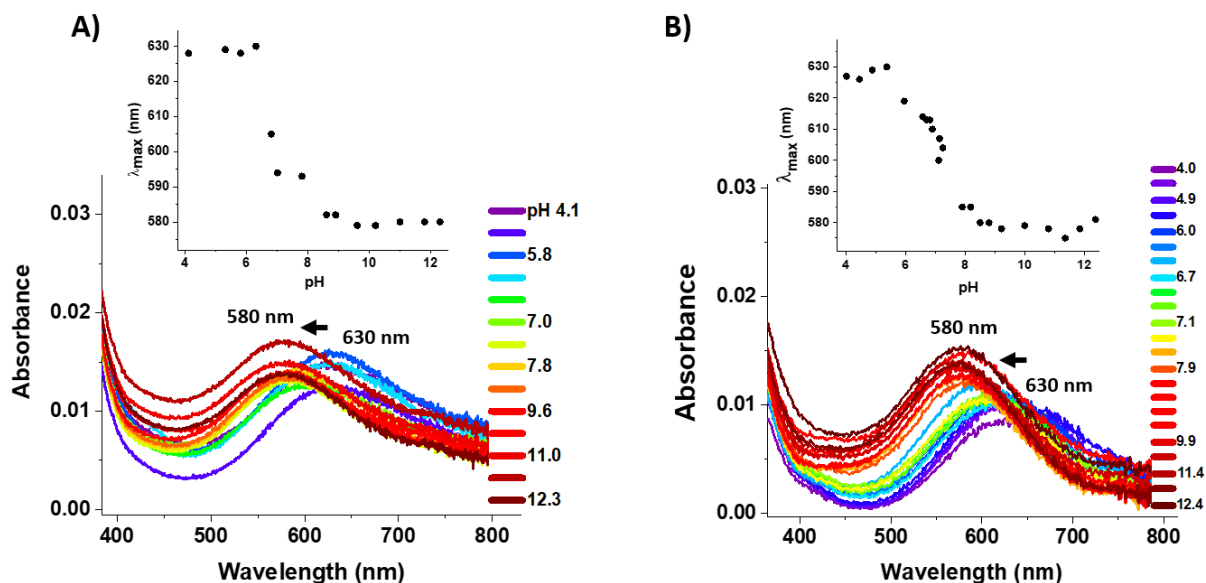

**Figure S20:** pH-dependence of the Cu<sup>II</sup>-binding to **A)** Eu<sup>III</sup>-C3AmpicH and **B)** C3AmpicH. Conditions: 100  $\mu$ M ligand, 90  $\mu$ M CuCl<sub>2</sub>, addition of aqueous NaOH solution. The scatter plot shows the shift of the absorbance maximum according to the pH-value.

EPR experiments were carried out to compare the Cu<sup>II</sup>-coordination sphere at neutral and basic conditions (pH 7-7.4 and 9.4-9.5). The results suggest a 4N Cu<sup>II</sup>-coordination sphere at pH 9.4-9.5 where the global charge of the molecule is 0 and a 3N1O Cu<sup>II</sup>-coordination sphere at neutral pH (+1 charged complex). The discrepancy between the EPR data, which suggests a predominant 3N1O coordination at pH 7–7.4, and the UV-Vis data, which indicates a 4N coordination at the same pH, can be attributed to the different temperatures at which these measurements were conducted.

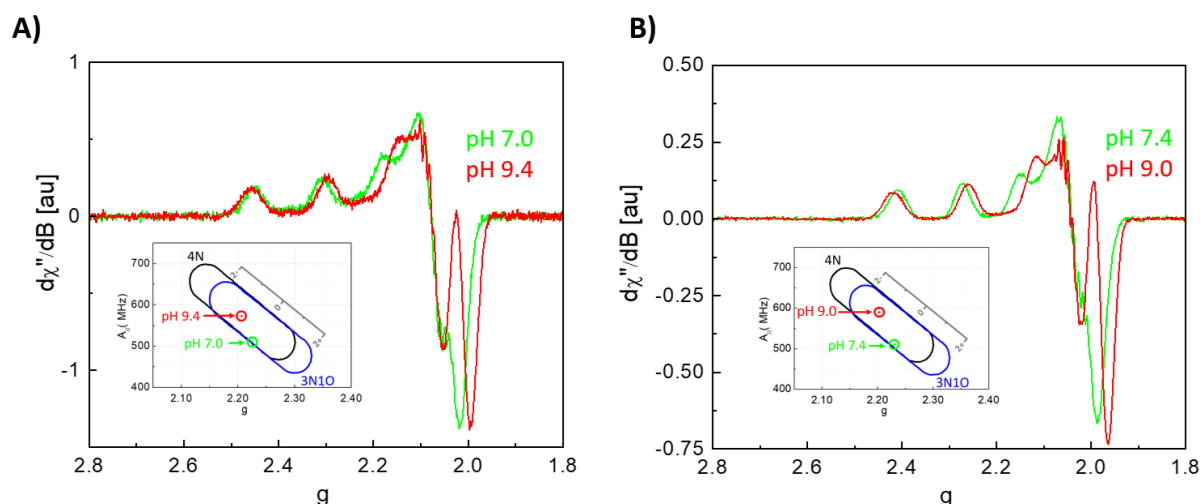

**Figure S21:** EPR Spectra of **A)** Eu<sup>III</sup>-Cu<sup>II</sup>-DO3A-C3AmpicH at pH 7 (green spectrum) and 9.4 (red spectrum) with [Cu<sup>II</sup>] = 500 μM, [Eu<sup>III</sup>-DO3A-C3AmpicH] = 600 μM, in 75 mM HEPES or CHES buffer for neutral and basic conditions, respectively and **B)** Cu<sup>II</sup>-C3AmpicH at pH 7.4 (green spectrum) and 9.5 (red spectrum) with [Cu<sup>II</sup>] = 500 μM, [C3AmpicH] = 600 μM, in 75 mM HEPES or CHES buffer for neutral and basic conditions, respectively. The samples have been supplemented with 10% glycerol and measured at 100K. Insets: Schematic representations of so-called Peisach-Blumberg diagrams pointing to the complex coordination sphere regarding the  $A_{//}$  and  $g_{//}$  together with the overall charge of the molecule (see Peisach J. and Blumberg).<sup>5</sup>

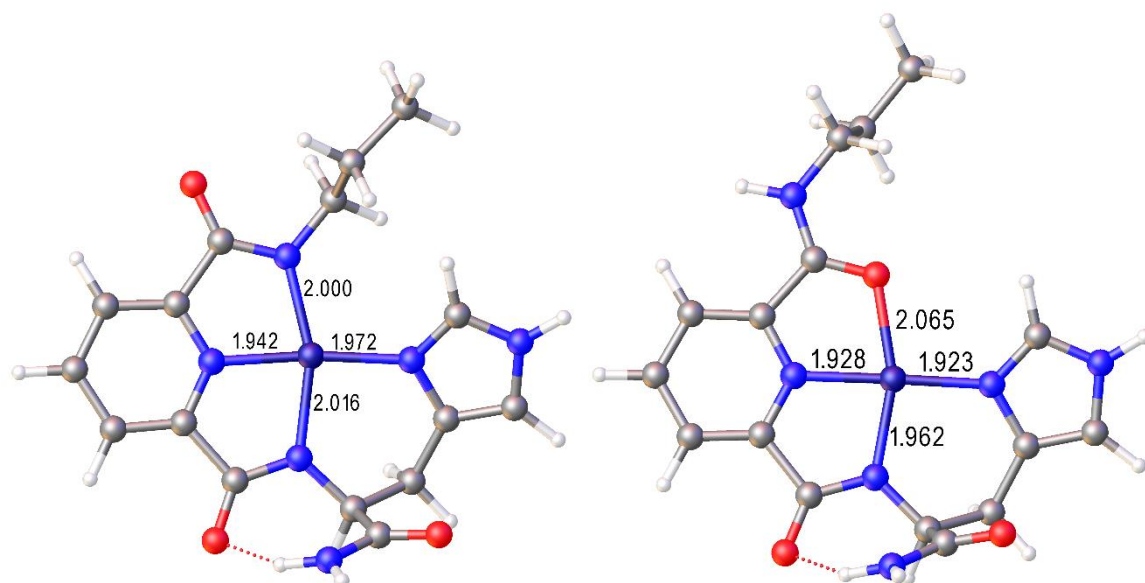

**Figure S22:** DFT structures calculated for the 4N (left) and 3N1O (right) forms of the Cu<sup>II</sup>-C3AmpicH complex.

## 2.5 Competition experiments

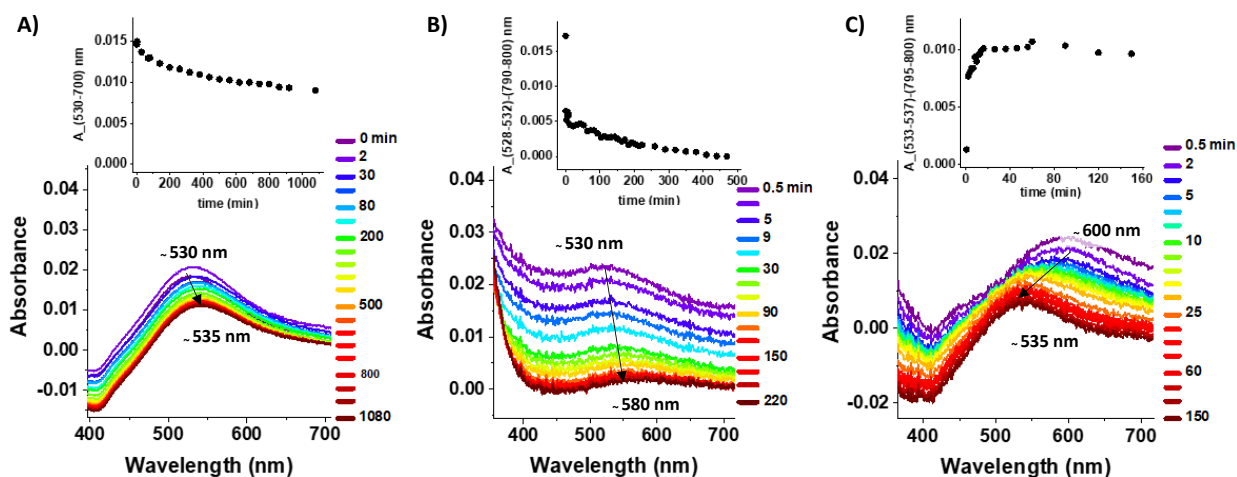

**Figure S23:** Competition experiments between  $\text{Eu}^{\text{III}}$ -DO3A-C3AmpicH and HSA for  $\text{Cu}^{\text{II}}$  monitored by UV-Vis absorption spectroscopy. **A)**  $\text{Cu}^{\text{II}}$ -HSA +  $\text{Eu}^{\text{III}}$ -DO3A-C3AmpicH (1:1), **B)**  $\text{Cu}^{\text{II}}$ -HSA +  $\text{Eu}^{\text{III}}$ -DO3A-C3AmpicH (1:10), **C)** HSA +  $\text{Eu}^{\text{III}}$ - $\text{Cu}^{\text{II}}$ -DO3A-C3AmpicH (1:1) Conditions: **A)** 200  $\mu\text{M}$   $\text{Eu}^{\text{III}}$ -DO3A-C3AmpicH, 200  $\mu\text{M}$  HSA, 180  $\mu\text{M}$   $\text{CuCl}_2$ , 50 mM HEPES pH 7.4. **B)** 500  $\mu\text{M}$   $\text{Eu}^{\text{III}}$ -DO3A-C3AmpicH, 50  $\mu\text{M}$  HSA, 45  $\mu\text{M}$   $\text{CuCl}_2$ , 50 mM HEPES pH 7.4 **C)** 200  $\mu\text{M}$   $\text{Eu}^{\text{III}}$ -DO3A-C3AmpicH, 200  $\mu\text{M}$  HSA, 180  $\mu\text{M}$   $\text{CuCl}_2$ , 50 mM HEPES pH 7.4.

When  $\text{Eu}^{\text{III}}$ -DO3A-C3AmpicH is added in a tenfold excess relative to HSA, the shift of the d-d band becomes more pronounced, approximately 50 nm, indicating a greater retrieval of copper from HSA.

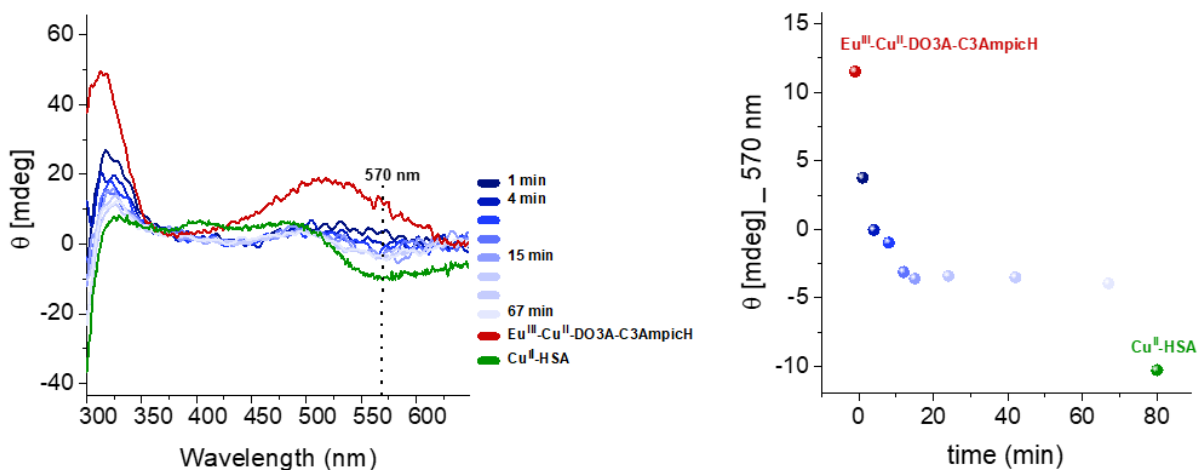

**Figure S24:** Competition experiment between HSA and  $\text{Eu}^{\text{III}}$ -DO3A-C3AmpicH for  $\text{Cu}^{\text{II}}$  monitored by CD.  $\text{Cu}^{\text{II}}$  transfer from  $\text{Eu}^{\text{III}}$ - $\text{Cu}^{\text{II}}$ -DO3A-C3AmpicH to HSA. Conditions: 500  $\mu\text{M}$   $\text{Eu}^{\text{III}}$ -DO3A-C3AmpicH, 500  $\mu\text{M}$  HSA, 450  $\mu\text{M}$   $\text{CuCl}_2$ , 50 mM HEPES pH 7.4. The curves were smoothed using the Savitzky Golay 15 filter.

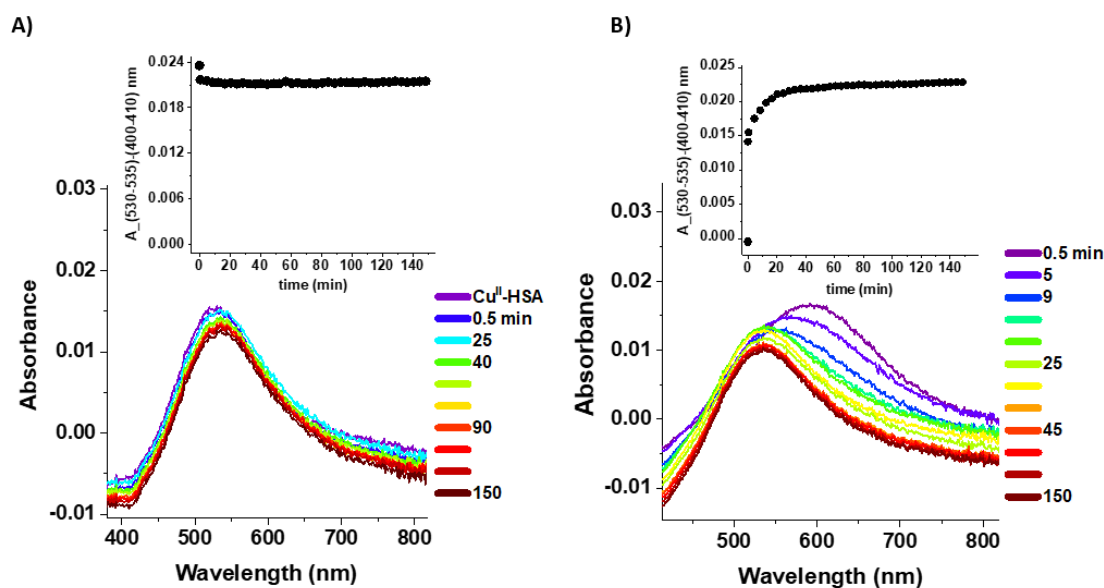

**Figure S25:** UV-Vis absorption spectra of the competition reaction between **A)**  $\text{Cu}^{\text{II}}$ -HSA and C3AmpicH and **B)** HSA and  $\text{Cu}^{\text{II}}$ -C3AmpicH. Conditions: 200  $\mu\text{M}$  HSA, 200  $\mu\text{M}$  C3AmpicH, 180  $\mu\text{M}$   $\text{CuCl}_2$ , 50 mM HEPES pH 7.4 (duplicate).

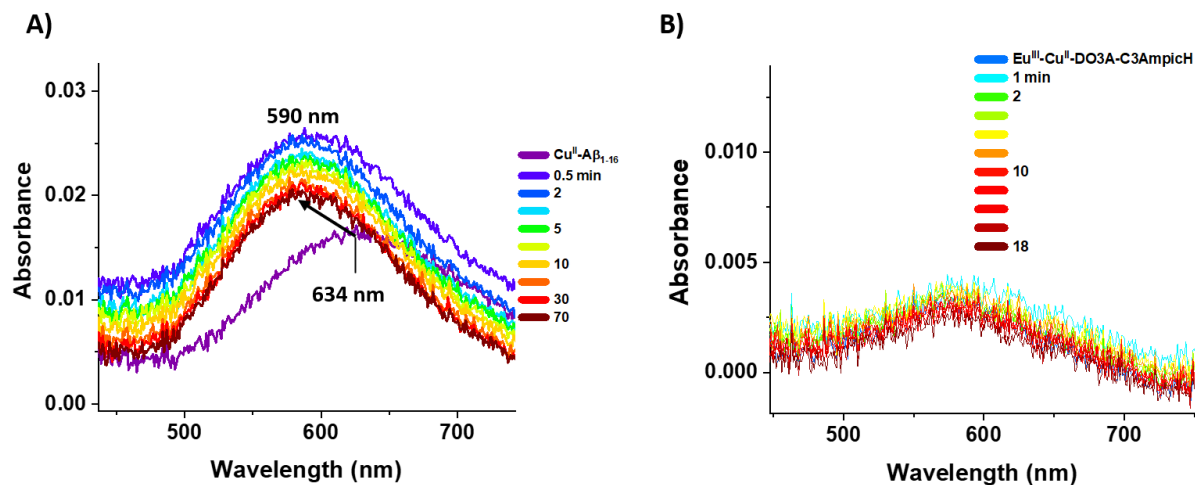

**Figure S26:** Competition experiments with  $\text{A}\beta_{1-16}$  ( $\log K_{\text{app}} = 10^{10}$ ). **A)** Competition between  $\text{Cu}^{\text{II}}$ - $\text{A}\beta_{1-16}$  and  $\text{Eu}^{\text{III}}$ -DO3A-C3AmpicH (1:1). Conditions: 200  $\mu\text{M}$   $\text{Eu}^{\text{III}}$ -DO3A-C3AmpicH, 180  $\mu\text{M}$   $\text{CuCl}_2$ , 200  $\mu\text{M}$   $\text{A}\beta_{1-16}$ , 50 mM HEPES pH 7.4.  $\text{Eu}^{\text{III}}$ -DO3A-C3AmpicH immediately retrieves  $\text{Cu}^{\text{II}}$  bound to  $\text{A}\beta_{1-16}$ . **B)** Competition between  $\text{A}\beta_{1-16}$  and  $\text{Eu}^{\text{III}}$ - $\text{Cu}^{\text{II}}$ -DO3A-C3AmpicH (1:1). Conditions: 30  $\mu\text{M}$   $\text{Eu}^{\text{III}}$ -DO3A-C3AmpicH, 27  $\mu\text{M}$   $\text{CuCl}_2$ , 300  $\mu\text{M}$   $\text{A}\beta_{1-16}$ , 50 mM HEPES pH 7.4,  $\text{A}\beta_{1-16}$  does not retrieve  $\text{Cu}^{\text{II}}$  from  $\text{Eu}^{\text{III}}$ -DO3A-C3AmpicH, not even in 10-fold excess.

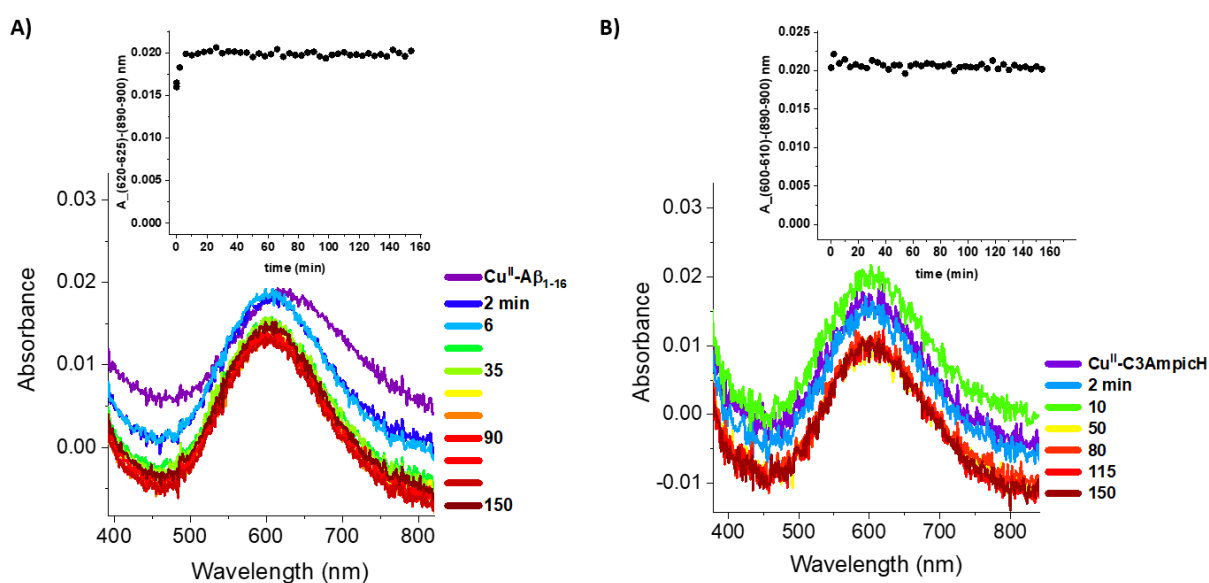

**Figure S27:** UV-Vis spectra of the competition reaction between **A)**  $\text{Cu}^{\text{II}}\text{-A}\beta_{1-16}$  and C3AmpicH and **B)**  $\text{A}\beta_{1-16}$  and  $\text{Cu}^{\text{II}}\text{-C3AmpicH}$ . Conditions : 200  $\mu\text{M}$   $\text{A}\beta_{1-16}$ , 200  $\mu\text{M}$  C3AmpicH, 180  $\mu\text{M}$   $\text{CuCl}_2$ , 50 mM HEPES pH 7.4 (duplicate).

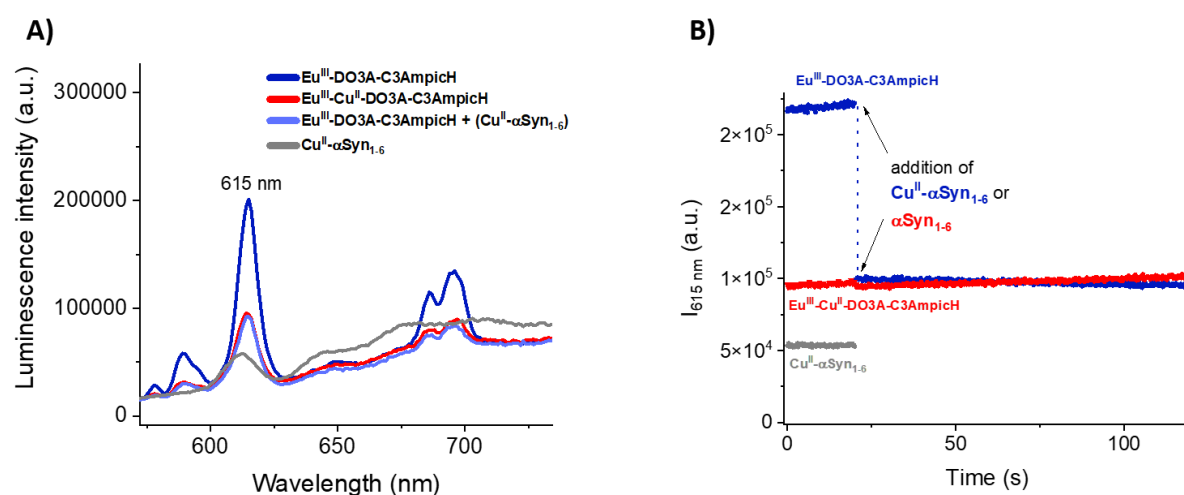

**Figure S28:** **A)** Luminescence spectra of the  $\text{Eu}^{\text{III}}$ -sensor with and without copper, of  $\text{Cu}^{\text{II}}\text{-}\alpha\text{Syn}_{1-6}$  and of the endpoint of the competition reaction. **B)** Evolution of the  $\text{Eu}^{\text{III}}$ -luminescence emission intensity at 615 nm. Conditions : 40  $\mu\text{M}$   $\text{Eu-DO3A-C3AmpicH}$ , 40  $\mu\text{M}$   $\alpha\text{Syn}_{1-6}$ , 36  $\mu\text{M}$   $\text{CuCl}_2$ , 25 mM HEPES pH 7.4,  $\lambda_{\text{ex}}=277$  nm. The small remaining luminescence intensity observed at 615 nm for the  $\text{Cu}^{\text{II}}\text{-}\alpha\text{Syn}$  control is attributed to a background signal, which is also present at the same intensity in the HEPES buffer alone. This signal shifts with changes in the excitation wavelength and is likely due to Raman scattering.

## 2.6 Selectivity over other metal ions

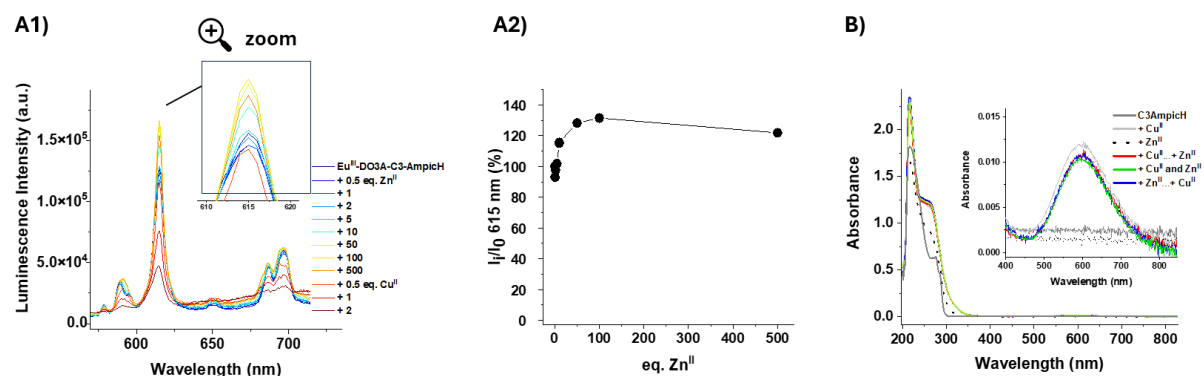

**Figure S29: A1)** Luminescence emission spectra of the titration of Eu<sup>III</sup>-DO3A-C3AmpicH with Zn<sup>II</sup>. **A2)** Evolution of the luminescence emission intensity at 615 nm. Conditions: 40  $\mu$ M Eu<sup>III</sup>- DO3A-C3AmpicH, 100 mM HEPES pH 7.4,  $\lambda_{exc} = 277$  nm. **B)** UV-Vis spectrum of the addition of 1 eq. Cu<sup>II</sup> and 10 eq. Zn<sup>II</sup> to C3AmpicH. Conditions: 100  $\mu$ M C3AmpicH, 100  $\mu$ M CuCl<sub>2</sub>, 1 mM ZnSO<sub>4</sub>, 10 mM TRIS buffer pH 7.4.

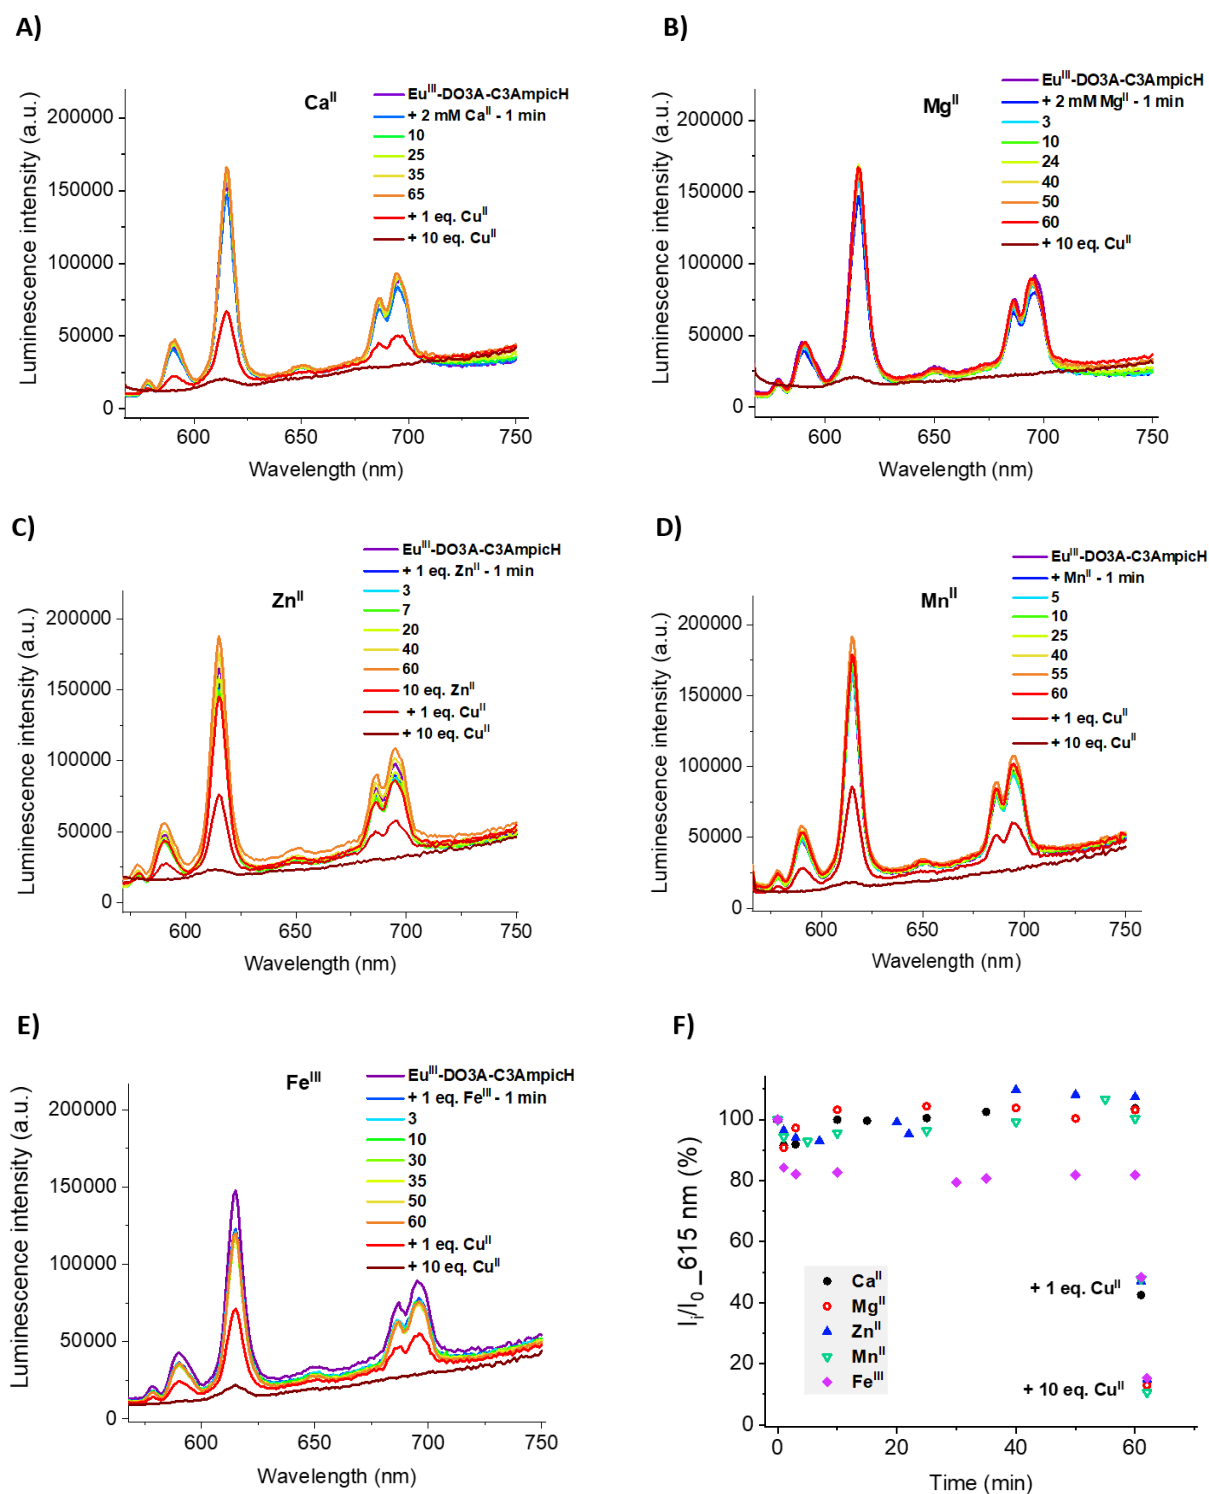

**Figure S30:** Luminescence emission spectra of Eu<sup>III</sup>-DO3A-C3AmpicH upon the separate addition of physiological metal ions (A-E) and scatter plot of the evolution of the relative luminescence intensity at 615 nm over time (F). Conditions: 40  $\mu$ M Eu<sup>III</sup>-DO3A-C3AmpicH, 100 mM HEPES pH 7.4, addition of 2 mM MgSO<sub>4</sub> or 2 mM CaCl<sub>2</sub> or 40  $\mu$ M Fe(NO<sub>3</sub>)<sub>3</sub> + 2 mM citric acid or 40  $\mu$ M ZnSO<sub>4</sub> or 40  $\mu$ M MnCl<sub>2</sub>.  $\lambda_{\text{exc}}$  = 277 nm.

As Fe<sup>III</sup> is very strongly bound to transferrin with a  $\log K_{a(\text{pH}7.4)} = 22$  and there is more apo- than holo-transferrin, this ion is however not expected to interfere with the copper binding in a physiological context.<sup>6</sup>



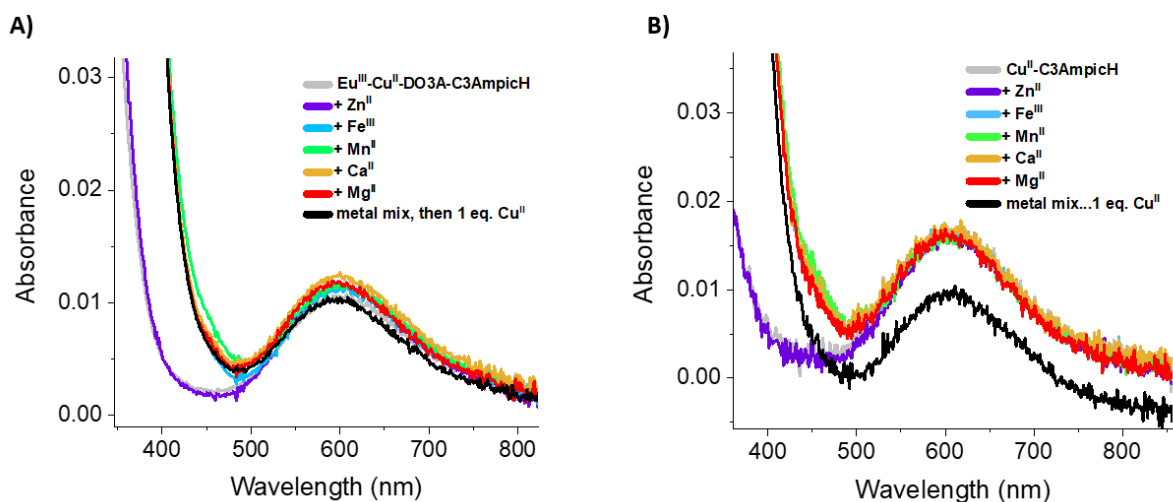

**Figure S31:** Addition of metal ions to the preformed **A)**  $\text{Eu}^{\text{III}}\text{-Cu}^{\text{II}}\text{-DO3A-C3AmpicH}$  complex and **B)**  $\text{Cu}^{\text{II}}\text{-C3AmpicH}$ . Conditions: A) 150  $\mu\text{M}$   $\text{Eu}^{\text{III}}\text{-DO3A-C3AmpicH}$ , 100  $\mu\text{M}$   $\text{CuCl}_2$ , 100  $\mu\text{M}$   $\text{ZnSO}_4$ , 100  $\mu\text{M}$   $\text{Fe}(\text{NO}_3)_3$ , 100  $\mu\text{M}$   $\text{MnCl}_2$ , 2 mM  $\text{CaCl}_2$ , 2 mM  $\text{MgSO}_4$ , 100 mM HEPES pH 7.4, 2 mM citric acid. B) 150  $\mu\text{M}$   $\text{C3AmpicH}$ , 150  $\mu\text{M}$   $\text{CuCl}_2$ , 150  $\mu\text{M}$   $\text{ZnSO}_4$ , 150  $\mu\text{M}$   $\text{Fe}(\text{NO}_3)_3$ , 150  $\mu\text{M}$   $\text{MnCl}_2$ , 2 mM  $\text{CaCl}_2$ , 2 mM  $\text{MgSO}_4$ , 150 mM HEPES pH 7.4, 2 mM citric acid. (duplicate).

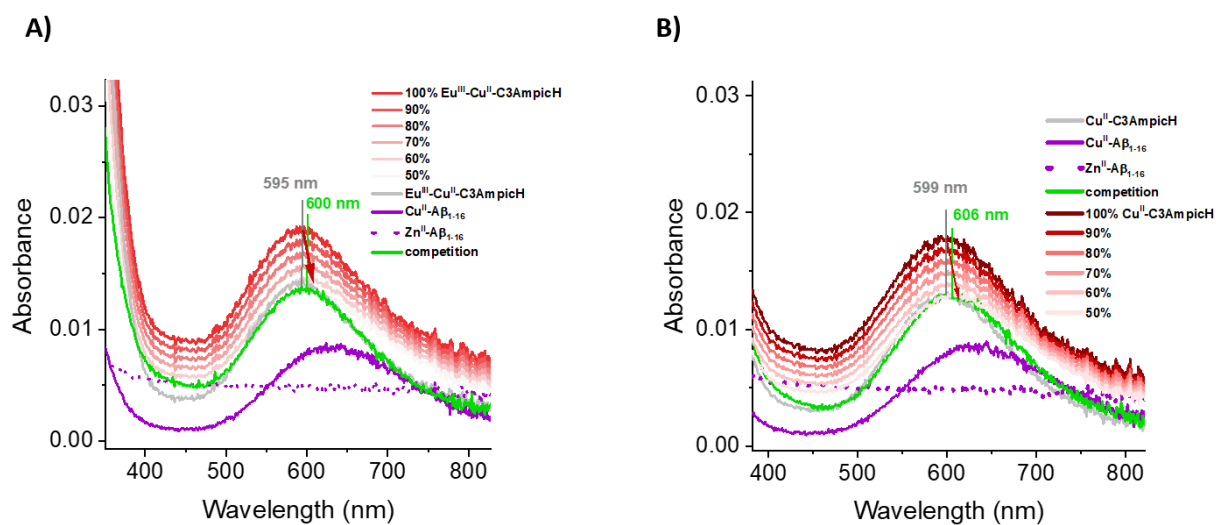

**Figure S32:** UV-VIS spectra of the selectivity experiments involving **A)**  $\text{Eu}^{\text{III}}\text{-DO3A-C3AmpicH}$  or **B)**  $\text{Cu}^{\text{II}}\text{-C3AmpicH}$  and  $\text{A}\beta_{1-16}$ ,  $\text{Cu}^{\text{II}}$  and  $\text{Zn}^{\text{II}}$  in an equimolar ratio. Conditions: A) 100  $\mu\text{M}$   $\text{C3AmpicH}$ , 100  $\mu\text{M}$   $\text{A}\beta_{1-16}$ , 100  $\mu\text{M}$   $\text{CuCl}_2$ , 100  $\mu\text{M}$   $\text{ZnSO}_4$  in 10 mM TRIS buffer pH 7.4. B) 100  $\mu\text{M}$   $\text{Eu}^{\text{III}}\text{-DO3A-C3AmpicH}$ , 100  $\mu\text{M}$   $\text{A}\beta_{1-16}$ , 100  $\mu\text{M}$   $\text{CuCl}_2$ , 100  $\mu\text{M}$   $\text{ZnSO}_4$ , 10 mM TRIS pH 7.4. The red curves were obtained as a linear combination of the curves of  $\text{Cu}^{\text{II}}\text{-C3AmpicH}$  or  $\text{Eu}^{\text{III}}\text{-Cu}^{\text{II}}\text{-DO3A-C3AmpicH}$ ,  $\text{Cu}^{\text{II}}\text{-A}\beta_{1-16}$  and  $\text{Zn}^{\text{II}}\text{-A}\beta_{1-16}$  using different coefficients. The linear combination abbreviated with 90% for example results from the addition of  $0.9 \cdot \text{Eu}^{\text{III}}\text{-Cu}^{\text{II}}\text{-DO3A-C3AmpicH} + 0.1 \cdot \text{Cu}^{\text{II}}\text{-A}\beta_{1-16} + 0.9 \cdot \text{Zn}^{\text{II}}\text{-A}\beta_{1-16}$ . The spectra of  $\text{Eu}^{\text{III}}\text{-Zn}^{\text{II}}\text{-DO3A-C3AmpicH}$  and  $\text{Zn}^{\text{II}}\text{-C3AmpicH}$  have not been considered in these calculation as they do not show any absorbance in the studied wavelength range. The comparison of the absorbance maximum of these linear combinations with the one of the competition experiments, suggests that around 80-90% of the copper seem to be bound to the ligand and 10-20% to  $\text{A}\beta_{1-16}$ .

## 2.7 Equations used for the fitting of the $^1\text{H}$ NMRD profiles

The measured longitudinal proton relaxation rate,  $R_I^{obs}$  is the sum of the paramagnetic and diamagnetic contributions as expressed in Eq. 1, where  $r_I$  is the proton relaxivity:

$$R_I^{obs} = R_I^d + R_I^p = R_I^d + r_I \times c_{Gd} \quad [1]$$

The relaxivity can be divided into terms of inner and outer sphere, as follows:

$$r_I = r_{Iis} + r_{Ios} \quad [2]$$

The inner sphere term is obtained in Eq. 3, where  $q$  is the number of inner sphere water molecules.<sup>7</sup>

$$r_{Iis} = \frac{1}{1000} \times \frac{q}{55.55} \times \frac{1}{T_{Im}^H + \tau_m} \quad [3]$$

The longitudinal relaxation rate of inner sphere protons,  $1/T_{Im}^H$  is expressed by Eq. 4, where  $r_{GdH}$  is the effective distance between the electron charge and the  $^1\text{H}$  nucleus,  $\omega_I$  is the proton resonance frequency and  $\omega_S$  is the Larmor frequency of the  $\text{Gd}^{\text{III}}$  electron spin.

$$\frac{1}{T_{Im}^H} = \frac{2}{15} \left( \frac{\mu_0}{4\pi} \right)^2 \frac{\hbar^2 \gamma_I^2 \gamma_S^2}{r_{GdH}^6} S(S+1) \times [3J(\omega_I; \tau_{d1}) + 7J(\omega_S; \tau_{d2})] \quad [4]$$

$$\frac{1}{\tau_{di}} = \frac{1}{\tau_m} + \frac{1}{\tau} + \frac{1}{T_{ie}} \quad [5]$$

The longitudinal and transverse electronic relaxation rates,  $1/T_{1e}$  and  $1/T_{2e}$  are expressed by Eq. 6-7, where  $\tau_v$  is the electronic correlation time for the modulation of the zero-field-splitting interaction,  $E_v$  the corresponding activation energy and  $\Delta^2$  is the mean square zero-field-splitting energy. We assumed a simple exponential dependence of  $\tau_v$  versus  $1/T$ .

$$\left( \frac{1}{T_{1e}} \right)^{ZFS} = \frac{1}{25} \Delta^2 \tau_v \{ 4S(S+1) - 3 \} \left( \frac{1}{1 + \omega_S^2 \tau_v^2} + \frac{4}{1 + 4\omega_S^2 \tau_v^2} \right) \quad [6]$$

$$\left( \frac{1}{T_{2e}} \right)^{ZFS} = \Delta^2 \tau_v \left( \frac{5.26}{1 + 0.372\omega_S^2 \tau_v^2} + \frac{7.18}{1 + 1.24\omega_S^2 \tau_v^2} \right) \quad [7]$$

$$\tau_v = \tau_v^{298} \exp \left\{ \frac{E_v}{R} \left( \frac{1}{T} - \frac{1}{298.15} \right) \right\} \quad [8]$$

The outer-sphere contribution can be described by Eq. 9 where  $N_A$  is the Avogadro constant, and  $J_{os}$  is its associated spectral density function.<sup>8,9</sup>

$$r_{los} = \frac{32 N_A \pi}{405} \left( \frac{\mu_0}{4\pi} \right)^2 \frac{\hbar^2 \gamma_S^2 \gamma_I^2}{a_{GdH} D_{GdH}} S(S+1) [3J_{os}(\omega_I, T_{Ie}) + 7J_{os}(\omega_S, T_{2e})] \quad [9]$$

$$J_{os}(\omega, T_{je}) = \text{Re} \left[ \frac{1 + \frac{1}{4} \left( i\omega\tau_{GdH} + \frac{\tau_{GdH}}{T_{je}} \right)^{1/2}}{1 + \left( i\omega\tau_{GdH} + \frac{\tau_{GdH}}{T_{je}} \right)^{1/2} + \frac{4}{9} \left( i\omega\tau_{GdH} + \frac{\tau_{GdH}}{T_{je}} \right) + \frac{1}{9} \left( i\omega\tau_{GdH} + \frac{\tau_{GdH}}{T_{je}} \right)^{3/2}} \right] \quad j = 1, 2 \quad [10]$$

The diffusion coefficient for the diffusion of a water proton away from a  $\text{Gd}^{\text{III}}$  complex,  $D_{GdH}$ , is assumed to obey an exponential law versus the inverse of the temperature, with an activation energy  $E_{GdH}$ , as given in Eq. 11  $D_{GdH}^{298}$  is the diffusion coefficient at 298.15 K.

$$D_{GdH} = D_{GdH}^{298} \exp \left\{ \frac{E_{GdH}}{R} \left( \frac{1}{298.15} - \frac{1}{T} \right) \right\} \quad [11]$$

In the fitting procedure, several parameters were fixed to the common values, such as: the relative diffusion coefficient, set to  $D_{GdH}^{298} = 2.6 \times 10^{-9} \text{ m}^2 \text{ s}^{-1}$  and the activation energy of the modulation of the zero-field splitting, set to  $E_v = 1 \text{ kJ mol}^{-1}$ . The water exchange rate and its activation energy were fixed to the values of Gd-DO3A due to the similar coordination sphere ( $k_{ex} = 11.10^6 \text{ s}^{-1}$ ,  $\Delta H^\ddagger = 33 \text{ kJ.mol}^{-1}$ ).<sup>10</sup> The diffusion coefficient ( $D_t$ ) was fixed to  $2.6.10^{-9} \text{ m}^2.\text{s}^{-1}$ , the Gd-water proton distance was fixed to the common value of 3.1 Å, while that of closest approach between  $\text{Gd}^{3+}$  and outer sphere protons to 3.5 Å. The rotational correlation time ( $\tau_R$ ), its activation energy ( $E_R$ ), the activation energy of the relative diffusion coefficient ( $E_{DGdH}$ ) and the electronic parameters, i.e. the mean square of the zero-field splitting ( $\Delta^2$ ) and the correlation time for the modulation of the zero-field splitting ( $\tau_v^{298}$ ) were fitted, but these electronic parameters should not be over-interpreted

## 2.8 DFT calculations

Geometry optimizations and frequency calculations were conducted with the Gaussian16 package (version C.01)<sup>11</sup>, using the wB97XD functional<sup>12</sup>, which incorporates empirical dispersion corrections, and the Def2-TZVP basis set<sup>13</sup> for the ligand atoms and Cu. For Gd we used the quasi-relativistic effective core potential of Dolg et al. (53 electrons in the core) and its associated (7s6p5d)/[5s4p3d] basis set.<sup>14</sup> The solvent effects of bulk water were incorporated using the integral equation formalism variant of the polarized continuum model (IEFPCM) implemented in Gaussian16.<sup>15</sup> The Gd complexes were modelled including a few explicit second-sphere water molecules to improve the description of the complexes.<sup>16</sup> The ORCA program package (version 5.0.3)<sup>17,18</sup> was used to calculate the  $g$ - and  $A$ -tensors. The  $A$ -tensors were obtained with the TPSS functional<sup>19</sup>, while  $g$ -tensors were calculated with the double hybrid PBE0-DH functional.<sup>20</sup> These calculations included scalar relativistic effects using the ZORA approximation<sup>21,22</sup>, using the def2-TZVPP basis set recontracted for ZORA calculations for Cu and the ZORA-def2-TZVP for ligand atoms.<sup>13,23</sup> The calculations were accelerated using the resolution of

identity (RI) the resolution of identity and chain-of-spheres (RIJCOSX)<sup>24</sup> approximations for TPSS and PBE0-DH, respectively, with auxiliary basis sets obtained with the Autoaux procedure<sup>25</sup>. All ORCA calculations incorporated water solvent effects with the SMD solvation model.<sup>26</sup> The spin-orbit coupling (SOC) contributions to the hyperfine coupling constant tensor was considered using the spin-orbit mean-field (SOMF(1X)) method.<sup>24,27</sup>

**Table S4:** Optimized Cartesian coordinates (Å) obtained for the Eu<sup>III</sup>-DO3A-C3AmpicH system (amide bound) using DFT calculations.<sup>a</sup>

| Center<br>Number | Atomic<br>Number | Coordinates |           |           |
|------------------|------------------|-------------|-----------|-----------|
|                  |                  | X           | Y         | Z         |
| 1                | 7                | -3.193243   | -2.460327 | -0.120128 |
| 2                | 6                | -4.545969   | -1.869983 | -0.287873 |
| 3                | 6                | -4.682183   | -0.792369 | -1.334920 |
| 4                | 7                | -3.966653   | 0.445566  | -1.004063 |
| 5                | 6                | -3.938335   | 1.334732  | -2.175923 |
| 6                | 6                | -3.014022   | 0.852993  | -3.268711 |
| 7                | 7                | -1.625123   | 0.658398  | -2.827047 |
| 8                | 6                | -0.959155   | -0.274920 | -3.748543 |
| 9                | 6                | -1.310229   | -1.717782 | -3.425560 |
| 10               | 7                | -0.818729   | -2.159336 | -2.108019 |
| 11               | 6                | -1.438145   | -3.438514 | -1.711627 |
| 12               | 6                | -2.896949   | -3.340774 | -1.280160 |
| 13               | 6                | -4.596045   | 1.155630  | 0.118475  |
| 14               | 6                | -3.761119   | 1.196149  | 1.386219  |
| 15               | 8                | -3.953012   | 2.147399  | 2.161925  |
| 16               | 8                | -2.953150   | 0.243989  | 1.579604  |
| 17               | 6                | -0.935211   | 1.948604  | -2.741794 |
| 18               | 6                | -1.299732   | 2.713844  | -1.473216 |
| 19               | 8                | -1.436734   | 3.936646  | -1.496751 |
| 20               | 8                | -1.414967   | 2.008971  | -0.412029 |
| 21               | 6                | 0.646144    | -2.284841 | -2.153275 |
| 22               | 6                | 1.398118    | -0.997613 | -1.821030 |
| 23               | 8                | 2.586803    | -0.934182 | -2.146825 |
| 24               | 8                | 0.757394    | -0.090854 | -1.211838 |
| 25               | 1                | -5.551035   | 0.695608  | 0.392450  |
| 26               | 1                | -4.830903   | 2.180347  | -0.163045 |
| 27               | 1                | -1.127324   | 2.575039  | -3.617801 |
| 28               | 1                | 0.137838    | 1.763300  | -2.672641 |
| 29               | 1                | 0.968344    | -3.008209 | -1.406590 |
| 30               | 1                | 0.982847    | -2.654766 | -3.126032 |
| 31               | 1                | -4.839376   | -1.461314 | 0.677355  |
| 32               | 1                | -5.263039   | -2.665976 | -0.523275 |
| 33               | 1                | -5.752282   | -0.590187 | -1.472130 |
| 34               | 1                | -4.316654   | -1.155053 | -2.293089 |
| 35               | 1                | -4.944573   | 1.446971  | -2.599552 |
| 36               | 1                | -3.633502   | 2.323372  | -1.841298 |
| 37               | 1                | -3.050915   | 1.574278  | -4.094213 |
| 38               | 1                | -3.381873   | -0.085013 | -3.677050 |
| 39               | 1                | -1.245475   | -0.070807 | -4.786635 |
| 40               | 1                | 0.115194    | -0.120365 | -3.690726 |
| 41               | 1                | -2.391404   | -1.841134 | -3.448647 |
| 42               | 1                | -0.907212   | -2.367667 | -4.211271 |
| 43               | 1                | -0.836817   | -3.840482 | -0.902420 |

|     |    |           |           |           |
|-----|----|-----------|-----------|-----------|
| 44  | 1  | -1.387595 | -4.161458 | -2.535544 |
| 45  | 1  | -3.490106 | -2.999052 | -2.125996 |
| 46  | 1  | -3.245321 | -4.357908 | -1.070829 |
| 47  | 64 | -1.357579 | -0.355188 | -0.213215 |
| 48  | 8  | -1.524996 | 4.969990  | 3.106431  |
| 49  | 8  | 0.054504  | 0.551156  | 1.704330  |
| 50  | 1  | -2.137283 | 5.022437  | 2.349364  |
| 51  | 1  | -1.913112 | 4.297369  | 3.694116  |
| 52  | 1  | -0.329060 | 0.337277  | 2.579323  |
| 53  | 1  | 0.140817  | 1.524814  | 1.722685  |
| 54  | 8  | -3.102921 | 4.594290  | 0.797945  |
| 55  | 1  | -3.443993 | 3.750980  | 1.133262  |
| 56  | 1  | -2.525004 | 4.374113  | 0.044765  |
| 57  | 8  | -2.593338 | 2.718177  | 4.411763  |
| 58  | 1  | -3.199576 | 2.817227  | 5.148841  |
| 59  | 1  | -3.142671 | 2.466530  | 3.631799  |
| 60  | 8  | -0.033216 | 3.290931  | 1.542943  |
| 61  | 1  | -0.463788 | 3.902007  | 2.177146  |
| 62  | 1  | -0.714929 | 3.048488  | 0.887856  |
| 63  | 8  | -1.523081 | 0.118511  | 3.927212  |
| 64  | 1  | -2.179754 | 0.114862  | 3.203153  |
| 65  | 1  | -1.676279 | 0.980112  | 4.346116  |
| 66  | 6  | -3.327044 | -3.254472 | 1.134881  |
| 67  | 1  | -4.130178 | -3.982775 | 0.970055  |
| 68  | 1  | -3.683810 | -2.564690 | 1.900531  |
| 69  | 6  | -2.108255 | -3.988778 | 1.679440  |
| 70  | 6  | 5.167830  | -1.280531 | 0.347683  |
| 71  | 8  | 6.353811  | -1.370234 | 0.639217  |
| 72  | 7  | 4.650476  | -0.233763 | -0.315964 |
| 73  | 6  | 5.547981  | 0.766054  | -0.861281 |
| 74  | 6  | 4.798398  | 1.706151  | -1.825366 |
| 75  | 1  | 4.251483  | 1.081979  | -2.533202 |
| 76  | 1  | 5.547696  | 2.267244  | -2.383190 |
| 77  | 6  | 2.643651  | 2.446514  | -0.612763 |
| 78  | 6  | 3.287627  | 4.493265  | -0.193107 |
| 79  | 1  | 2.001318  | 1.578423  | -0.628006 |
| 80  | 1  | 3.253923  | 5.502957  | 0.185113  |
| 81  | 1  | 1.430946  | 3.745465  | 0.538641  |
| 82  | 6  | 3.883087  | 2.670988  | -1.144907 |
| 83  | 7  | 2.281770  | 3.618308  | -0.009828 |
| 84  | 7  | 4.275894  | 3.962176  | -0.877519 |
| 85  | 1  | 6.347406  | 0.269694  | -1.415909 |
| 86  | 6  | 6.261123  | 1.586606  | 0.215679  |
| 87  | 8  | 7.345091  | 2.099588  | -0.023013 |
| 88  | 7  | 5.616635  | 1.731650  | 1.381245  |
| 89  | 1  | 6.002318  | 2.331060  | 2.089161  |
| 90  | 1  | 4.693656  | 1.355058  | 1.506407  |
| 91  | 6  | 4.217499  | -2.386311 | 0.741860  |
| 92  | 6  | 4.757499  | -3.654890 | 0.927774  |
| 93  | 6  | 2.140212  | -3.099301 | 1.327709  |
| 94  | 6  | 3.920223  | -4.682652 | 1.308534  |
| 95  | 1  | 5.813663  | -3.812251 | 0.765737  |
| 96  | 6  | 2.582532  | -4.399924 | 1.526320  |
| 97  | 1  | 4.298237  | -5.687568 | 1.438453  |
| 98  | 1  | 1.894544  | -5.179736 | 1.822247  |
| 99  | 7  | 2.930709  | -2.110563 | 0.918089  |
| 100 | 6  | 0.690065  | -2.773809 | 1.540110  |
| 101 | 8  | 0.055311  | -2.086093 | 0.734488  |

|     |   |           |           |           |
|-----|---|-----------|-----------|-----------|
| 102 | 7 | 0.098269  | -3.311948 | 2.595987  |
| 103 | 1 | -2.456241 | -4.925124 | 2.115073  |
| 104 | 1 | -1.431986 | -4.276422 | 0.879935  |
| 105 | 6 | -1.338406 | -3.206028 | 2.758281  |
| 106 | 1 | -1.578514 | -3.580386 | 3.750278  |
| 107 | 1 | -1.610816 | -2.151726 | 2.750047  |
| 108 | 1 | 0.639324  | -3.838669 | 3.259750  |
| 109 | 1 | 3.740757  | -0.351884 | -0.764776 |

<sup>a</sup> E(RwB97XD) = -2887.76007604 Hartree; Zero-point correction = 0.906867; Thermal correction to Energy = 0.965697; Thermal correction to Enthalpy = 0.966641; Thermal correction to Gibbs Free Energy = 0.816783; Sum of electronic and zero-point Energies = -2886.853209; Sum of electronic and thermal Energies = -2886.794379; Sum of electronic and thermal Enthalpies = -2886.793435; Sum of electronic and thermal Free Energies = -2886.943293.

**Table S5:** Optimized Cartesian coordinates (Å) obtained for the Eu<sup>III</sup>-DO3A-C3AmpicH system (amide unbound) using DFT calculations.<sup>a</sup>

| Center<br>Number | Atomic<br>Number | Coordinates |           |           |
|------------------|------------------|-------------|-----------|-----------|
|                  |                  | X           | Y         | Z         |
| 1                | 7                | 1.018007    | 2.072277  | -0.844049 |
| 2                | 6                | 2.091020    | 3.001051  | -1.254251 |
| 3                | 6                | 3.175445    | 2.382221  | -2.108508 |
| 4                | 7                | 3.964690    | 1.333319  | -1.441544 |
| 5                | 6                | 4.676942    | 0.537207  | -2.458824 |
| 6                | 6                | 3.772351    | -0.441805 | -3.179313 |
| 7                | 7                | 3.116205    | -1.415667 | -2.289765 |
| 8                | 6                | 1.964642    | -2.021914 | -2.982125 |
| 9                | 6                | 0.753914    | -1.106176 | -3.008962 |
| 10               | 7                | 0.239242    | -0.751213 | -1.671726 |
| 11               | 6                | -0.635553   | 0.435634  | -1.751093 |
| 12               | 6                | 0.122925    | 1.734690  | -1.967004 |
| 13               | 6                | 4.918293    | 1.894336  | -0.469926 |
| 14               | 6                | 4.478380    | 1.799966  | 0.985351  |
| 15               | 8                | 5.337008    | 1.938204  | 1.864316  |
| 16               | 8                | 3.247634    | 1.572033  | 1.209930  |
| 17               | 6                | 4.071227    | -2.444191 | -1.856564 |
| 18               | 6                | 4.965555    | -1.977604 | -0.710405 |
| 19               | 8                | 6.121205    | -2.383103 | -0.620121 |
| 20               | 8                | 4.412729    | -1.188918 | 0.127867  |
| 21               | 6                | -0.493052   | -1.888705 | -1.097662 |
| 22               | 6                | 0.410965    | -2.933882 | -0.447502 |
| 23               | 8                | 0.104096    | -4.115350 | -0.483191 |
| 24               | 8                | 1.437175    | -2.457698 | 0.168305  |
| 25               | 1                | 5.130611    | 2.948093  | -0.680803 |
| 26               | 1                | 5.867967    | 1.368123  | -0.542038 |
| 27               | 1                | 4.684692    | -2.804086 | -2.687359 |
| 28               | 1                | 3.507780    | -3.290322 | -1.458647 |
| 29               | 1                | -1.131612   | -1.517823 | -0.292950 |
| 30               | 1                | -1.140722   | -2.365614 | -1.838204 |
| 31               | 1                | 2.530285    | 3.407137  | -0.344202 |
| 32               | 1                | 1.678988    | 3.844353  | -1.817772 |
| 33               | 1                | 3.836552    | 3.186957  | -2.451910 |

|    |    |           |           |           |
|----|----|-----------|-----------|-----------|
| 34 | 1  | 2.732331  | 1.953138  | -3.004832 |
| 35 | 1  | 5.142718  | 1.190685  | -3.205746 |
| 36 | 1  | 5.487630  | 0.002441  | -1.970319 |
| 37 | 1  | 4.364342  | -0.965912 | -3.938925 |
| 38 | 1  | 2.998733  | 0.101195  | -3.717726 |
| 39 | 1  | 2.223593  | -2.282313 | -4.014790 |
| 40 | 1  | 1.718469  | -2.956434 | -2.482635 |
| 41 | 1  | 1.001974  | -0.188621 | -3.536920 |
| 42 | 1  | -0.036367 | -1.590818 | -3.593740 |
| 43 | 1  | -1.193596 | 0.490239  | -0.816171 |
| 44 | 1  | -1.372171 | 0.318999  | -2.554693 |
| 45 | 1  | 0.712561  | 1.677368  | -2.879312 |
| 46 | 1  | -0.611220 | 2.529289  | -2.136226 |
| 47 | 64 | 2.264459  | -0.239103 | 0.005064  |
| 48 | 8  | 3.084180  | -1.143279 | 2.410467  |
| 49 | 8  | 0.449974  | -0.029416 | 1.700620  |
| 50 | 1  | 3.871065  | -1.550273 | 2.024317  |
| 51 | 1  | 3.433793  | -0.474447 | 3.038872  |
| 52 | 1  | 0.693275  | 0.617724  | 2.401189  |
| 53 | 1  | 0.385666  | -0.889459 | 2.157592  |
| 54 | 8  | 7.283310  | -0.343909 | 1.184645  |
| 55 | 1  | 6.616088  | 0.301452  | 1.447079  |
| 56 | 1  | 6.809553  | -1.013735 | 0.665958  |
| 57 | 8  | 4.192353  | 0.751343  | 4.058967  |
| 58 | 1  | 4.846453  | 0.434660  | 4.684620  |
| 59 | 1  | 4.678027  | 1.258873  | 3.371701  |
| 60 | 8  | 0.751415  | -2.644676 | 2.835893  |
| 61 | 1  | 1.557683  | -2.313653 | 3.251170  |
| 62 | 1  | 1.057237  | -2.847134 | 1.931874  |
| 63 | 8  | 1.584455  | 1.804861  | 3.377187  |
| 64 | 1  | 2.297711  | 1.883807  | 2.714694  |
| 65 | 1  | 2.044137  | 1.431504  | 4.136980  |
| 66 | 6  | 0.241596  | 2.686115  | 0.257985  |
| 67 | 1  | 0.840485  | 2.627522  | 1.165170  |
| 68 | 1  | -0.641652 | 2.071907  | 0.428458  |
| 69 | 6  | -0.163922 | 4.148784  | 0.049901  |
| 70 | 6  | -6.630789 | 0.024973  | -0.883204 |
| 71 | 8  | -7.682747 | -0.279714 | -1.444781 |
| 72 | 7  | -5.759738 | -0.851553 | -0.387814 |
| 73 | 6  | -5.884064 | -2.291358 | -0.511393 |
| 74 | 6  | -4.501033 | -2.937504 | -0.582111 |
| 75 | 1  | -4.039949 | -2.595831 | -1.513330 |
| 76 | 1  | -4.625920 | -4.015972 | -0.665631 |
| 77 | 6  | -2.710113 | -3.469402 | 1.195394  |
| 78 | 6  | -2.513787 | -1.437482 | 1.987714  |
| 79 | 1  | -2.501960 | -4.517219 | 1.073918  |
| 80 | 1  | -2.149885 | -0.617918 | 2.585048  |
| 81 | 1  | -1.255774 | -2.963731 | 2.678445  |
| 82 | 6  | -3.580412 | -2.634677 | 0.558557  |
| 83 | 7  | -2.040379 | -2.691766 | 2.101447  |
| 84 | 7  | -3.443028 | -1.362146 | 1.065276  |
| 85 | 1  | -6.403238 | -2.493393 | -1.452601 |
| 86 | 6  | -6.775981 | -2.895116 | 0.592029  |
| 87 | 8  | -6.411473 | -3.819126 | 1.299979  |
| 88 | 7  | -7.995227 | -2.337294 | 0.676119  |
| 89 | 1  | -8.652553 | -2.690993 | 1.349206  |
| 90 | 1  | -8.286291 | -1.634509 | 0.011494  |
| 91 | 6  | -6.238532 | 1.469159  | -0.689550 |

|     |   |           |           |           |
|-----|---|-----------|-----------|-----------|
| 92  | 6 | -7.073324 | 2.478063  | -1.145240 |
| 93  | 6 | -4.708884 | 2.959800  | 0.113640  |
| 94  | 6 | -6.680921 | 3.789106  | -0.943345 |
| 95  | 1 | -8.002228 | 2.227527  | -1.636456 |
| 96  | 6 | -5.476419 | 4.039963  | -0.307850 |
| 97  | 1 | -7.306195 | 4.608187  | -1.272521 |
| 98  | 1 | -5.152336 | 5.055459  | -0.124887 |
| 99  | 7 | -5.089526 | 1.703623  | -0.068466 |
| 100 | 6 | -3.398350 | 3.149067  | 0.847063  |
| 101 | 8 | -3.110527 | 2.472224  | 1.821512  |
| 102 | 7 | -2.616274 | 4.117847  | 0.341647  |
| 103 | 1 | 0.674021  | 4.802934  | 0.293419  |
| 104 | 1 | -0.418785 | 4.348517  | -0.993370 |
| 105 | 6 | -1.355520 | 4.548090  | 0.913420  |
| 106 | 1 | -1.385461 | 5.632899  | 1.020887  |
| 107 | 1 | -1.279467 | 4.116656  | 1.910914  |
| 108 | 1 | -2.911336 | 4.569654  | -0.507370 |
| 109 | 1 | -4.950770 | -0.504770 | 0.127053  |

-----  
<sup>a</sup> E(RwB97XD) = -2887.75206611 Hartree; Zero-point correction = 0.903666; Thermal correction to Energy = 0.964275; Thermal correction to Enthalpy = 0.965219; Thermal correction to Gibbs Free Energy = 0.809254; Sum of electronic and zero-point Energies = -2886.848400; Sum of electronic and thermal Energies = -2886.787791; Sum of electronic and thermal Enthalpies = -2886.786847; Sum of electronic and thermal Free Energies = -2886.942812.

**Table S6:** Optimized Cartesian coordinates (Å) obtained for the Cull-C3AmpicH system (4N) using DFT calculations.<sup>a</sup>

| Center<br>Number | Atomic<br>Number | Coordinates |           |           |
|------------------|------------------|-------------|-----------|-----------|
|                  |                  | X           | Y         | Z         |
| 1                | 6                | -3.815577   | 3.757254  | 0.817664  |
| 2                | 1                | -3.090869   | 4.436510  | 0.360890  |
| 3                | 1                | -4.706110   | 3.751635  | 0.185011  |
| 4                | 6                | -3.241008   | 2.354993  | 0.960247  |
| 5                | 6                | 1.406033    | -2.253523 | -0.164324 |
| 6                | 8                | 2.323415    | -3.088973 | -0.123563 |
| 7                | 7                | 1.508277    | -0.934962 | -0.291309 |
| 8                | 29               | -0.225450   | 0.092461  | -0.240573 |
| 9                | 6                | 2.827008    | -0.369068 | -0.519028 |
| 10               | 6                | 2.728234    | 0.899555  | -1.366784 |
| 11               | 1                | 2.276613    | 0.612423  | -2.319820 |
| 12               | 1                | 3.731228    | 1.264458  | -1.582678 |
| 13               | 6                | 2.301770    | 3.314382  | -0.590619 |
| 14               | 6                | 0.264050    | 3.029715  | 0.165553  |
| 15               | 1                | 3.214123    | 3.835426  | -0.817647 |
| 16               | 1                | -0.684206   | 3.250087  | 0.621912  |
| 17               | 1                | 1.175137    | 4.901048  | 0.264550  |
| 18               | 6                | 1.943420    | 2.015271  | -0.764401 |
| 19               | 7                | 1.230102    | 3.933264  | -0.003002 |
| 20               | 7                | 0.655908    | 1.856159  | -0.291785 |
| 21               | 1                | 3.421568    | -1.092934 | -1.089569 |
| 22               | 6                | 3.621632    | -0.139498 | 0.781216  |
| 23               | 8                | 4.124508    | 0.937006  | 1.066879  |
| 24               | 7                | 3.743074    | -1.230816 | 1.555131  |
| 25               | 1                | 4.290009    | -1.173755 | 2.396432  |



|    |   |           |           |           |
|----|---|-----------|-----------|-----------|
| 26 | 1 | 3.408545  | -2.125812 | 1.221532  |
| 27 | 6 | -0.028127 | -2.713634 | -0.058242 |
| 28 | 6 | -0.470290 | -4.017225 | 0.061911  |
| 29 | 6 | -2.208707 | -1.892637 | -0.048088 |
| 30 | 6 | -1.842335 | -4.233798 | 0.127299  |
| 31 | 1 | 0.239178  | -4.831022 | 0.100086  |
| 32 | 6 | -2.731560 | -3.167533 | 0.070302  |
| 33 | 1 | -2.221122 | -5.243120 | 0.220560  |
| 34 | 1 | -3.801215 | -3.312723 | 0.113415  |
| 35 | 7 | -0.900870 | -1.722613 | -0.101504 |
| 36 | 6 | -2.986117 | -0.597653 | -0.146612 |
| 37 | 8 | -4.222368 | -0.629873 | -0.129969 |
| 38 | 7 | -2.190445 | 0.464765  | -0.263735 |
| 39 | 1 | -2.366451 | 2.369519  | 1.618523  |
| 40 | 1 | -3.968890 | 1.695856  | 1.438242  |
| 41 | 6 | -2.849113 | 1.750155  | -0.385816 |
| 42 | 1 | -2.177212 | 2.430722  | -0.914713 |
| 43 | 1 | -3.748757 | 1.652471  | -1.002057 |
| 44 | 1 | -4.096150 | 4.171442  | 1.786945  |

<sup>a</sup> E(UwB97XD) = -2815.5194075 Hartree; Zero-point correction = 0.346556; Thermal correction to Energy = 0.369842; Thermal correction to Enthalpy = 0.370786; Thermal correction to Gibbs Free Energy = 0.293006; Sum of electronic and zero-point Energies = -2815.172851; Sum of electronic and thermal Energies = -2815.149566; Sum of electronic and thermal Enthalpies = -2815.148622; Sum of electronic and thermal Free Energies = -2815.226402.

**Table S7:** Optimized Cartesian coordinates (Å) obtained for the Cull-C3AmpicH system (3N1O) using DFT calculations.<sup>a</sup>

| Center Number | Atomic Number | Coordinates |           |           |
|---------------|---------------|-------------|-----------|-----------|
|               |               | X           | Y         | Z         |
| 1             | 6             | -5.929559   | -2.508839 | 0.338932  |
| 2             | 1             | -6.817008   | -2.302251 | -0.263044 |
| 3             | 1             | -5.342690   | -3.271016 | -0.177964 |
| 4             | 6             | -5.110896   | -1.245003 | 0.559635  |
| 5             | 6             | 1.763633    | 2.036882  | 0.451228  |
| 6             | 8             | 2.700952    | 2.829961  | 0.587861  |
| 7             | 7             | 1.814902    | 0.707454  | 0.417075  |
| 8             | 29            | 0.111714    | -0.201948 | 0.067344  |
| 9             | 6             | 3.090772    | 0.039595  | 0.609696  |
| 10            | 6             | 2.908113    | -1.313208 | 1.298717  |
| 11            | 1             | 2.486631    | -1.111006 | 2.286913  |
| 12            | 1             | 3.887492    | -1.762689 | 1.456393  |
| 13            | 6             | 2.248682    | -3.638540 | 0.403554  |
| 14            | 6             | 0.271776    | -3.106588 | -0.389969 |
| 15            | 1             | 3.084455    | -4.270582 | 0.643212  |
| 16            | 1             | -0.692988   | -3.195129 | -0.858835 |
| 17            | 1             | 0.964983    | -5.066588 | -0.508354 |
| 18            | 6             | 2.041640    | -2.310616 | 0.602329  |
| 19            | 7             | 1.124432    | -4.115936 | -0.220723 |
| 20            | 7             | 0.794876    | -1.998837 | 0.101258  |
| 21            | 1             | 3.705980    | 0.656139  | 1.273861  |
| 22            | 6             | 3.875448    | -0.072822 | -0.711259 |
| 23            | 8             | 4.192948    | -1.144219 | -1.203186 |
| 24            | 7             | 4.193766    | 1.111416  | -1.259012 |

|    |   |           |           |           |
|----|---|-----------|-----------|-----------|
| 25 | 1 | 4.694175  | 1.133654  | -2.130391 |
| 26 | 1 | 3.933360  | 1.973360  | -0.800252 |
| 27 | 6 | 0.354232  | 2.560237  | 0.269136  |
| 28 | 6 | -0.036735 | 3.886365  | 0.280424  |
| 29 | 6 | -1.827806 | 1.849573  | -0.139802 |
| 30 | 6 | -1.379232 | 4.170416  | 0.076013  |
| 31 | 1 | 0.693689  | 4.665416  | 0.442908  |
| 32 | 6 | -2.298464 | 3.148718  | -0.140483 |
| 33 | 1 | -1.719051 | 5.196976  | 0.080412  |
| 34 | 1 | -3.339856 | 3.385058  | -0.303672 |
| 35 | 7 | -0.542141 | 1.611802  | 0.065674  |
| 36 | 6 | -2.561695 | 0.551679  | -0.352917 |
| 37 | 8 | -1.894507 | -0.504277 | -0.315378 |
| 38 | 7 | -3.856710 | 0.564754  | -0.576710 |
| 39 | 1 | -5.703143 | -0.501066 | 1.097548  |
| 40 | 1 | -4.236042 | -1.466088 | 1.175136  |
| 41 | 6 | -4.644452 | -0.647229 | -0.762024 |
| 42 | 1 | -5.496334 | -0.383316 | -1.387652 |
| 43 | 1 | -4.032299 | -1.362837 | -1.310203 |
| 44 | 1 | -4.343524 | 1.445321  | -0.565715 |
| 45 | 1 | -6.259291 | -2.926904 | 1.290147  |

<sup>a</sup> E(UwB97XD) = -2815.9802924 Hartree; Zero-point correction = 0.360035; Thermal correction to Energy = 0.383897; Thermal correction to Enthalpy = 0.384841; Thermal correction to Gibbs Free Energy = 0.304590; Sum of electronic and zero-point Energies = -2815.620257; Sum of electronic and thermal Energies = -2815.596396; Sum of electronic and thermal Enthalpies = -2815.595451; Sum of electronic and thermal Free Energies = -2815.675702.

## References:

- 1 N. Wolf, L. Kersting, C. Herok, C. Mihm and J. Seibel, *J. Org. Chem.*, 2020, **85**, 9751–9760.
- 2 S. Stoll and A. Schweiger, *J. Magn. Reson.*, 2006, **178**, 42–55.
- 3 K. Zimmerer, A. Pallier, B. Vilen, M. Sanadar, F. Szeremeta, C. Platas-Iglesias, P. Faller, C. S. Bonnet and A. Sour, *Inorg Chem*, 2024, **63**, 23067–23076.
- 4 Z. Benkhellat, M. Allali, M. Beley, E. Wenger, M. Bernard, N. Parizel, K. Selmeczi and J. P. Joly, *New J. Chem.*, 2013, **38**, 419–429.
- 5 J. Peisach and W. E. Blumberg, *Arch Biochem Biophys*, 1974, **165**, 691–708.
- 6 P. Aisen, A. Leibman and J. Zweier, *J. Biol. Chem.*, 1978, **253**, 1930–1937.
- 7 Z. Luz and S. Meiboom, *J Chem Phys*, 1964, **40**, 2686–2692.
- 8 J. H. Freed, *J Chem Phys*, 1978, **68**, 4034–4037.
- 9 S. H. Koenig, R. D. Brown, M. Spiller, B. Chakrabarti and A. Pande, *Biophys J*, 1992, **61**, 776–785.
- 10 É. Tóth, O. M. Ni Dhubhghaill, G. Besson, L. Helm and A. E. Merbach, *Magn. Reson. Chem.*, 1999, **37**, 701–708.

- 11 M. J. ; Frisch, G. W. ; Trucks, H. B. ; Schlegel, Scuseria G. E., Robb M. A., J. R. ; Cheeseman, G. ; Scalmani, V. ; Barone, G. A. ; Petersson, H. ; L. X. ; Nakatsuji, M. ; Caricato, A. V. ; Marenich, J. ; Bloino, B. G. ; Janesko, R. ; Gomperts, B. ; Mennucci, H. P. ; Hratchian, J. V. ; Ortiz, A. F. ; Izmaylov, J. L. ; Sonnenberg, D. ; Williams-Young, F. ; Ding, A. ; Petrone, T. ; Henderson, D. ; Ranasinghe, V. G. ; Zakrzewski, J. ; Gao, N. ; Rega, G. ; Zheng, W. ; Liang, M. ; Hada, M. ; Ehara, F. ; Lipparini, F. ; Egidi, J. ; Goings, B. ; Peng, K. ; Toyota, R. ; Fukuda, J. ; Hasegawa, M. ; Ishida, T. ; Nakajima, Y. ; Honda, O. ; Kitao, Nakai H., T. ; Vreven, K. ; Throssell, J. A. , Montgomery, J. E. ; Jr.; Peralta, F. ; Ogliaro, M. J. ; Bearpark, J. J. ; Heyd, E. N. ; Brothers, K. N. ; Kudin, V. N. ; Staroverov, T. A. ; Keith, R. ; Kobayashi, J. Normand, R. ; Cammi, J. W. ; Ochterski, R. L. ; Martin, K. ; Morokuma, O. ; Farkas, J. B. ; Foresman, D. J. M. R. L. ; Fox, K. ; Morokuma, O. ; Farkas, J. B. ; Foresman, D. J. Fox, K. ; Raghavachari, A. P. ; B. J. C. ; I. S. S. ; T. J. ; Rendell, M. ; Cossi, J. M. ; Millam, M. ; Klene and C. ; Adamo, *Gaussian16 Revision C.01*.
- 12 J.-D. Chai and M. Head-Gordon, *Phys. Chem. Chem. Phys.*, 2008, **10**, 6615.
- 13 F. Weigend and R. Ahlrichs, *Phys. Chem. Chem. Phys.*, 2005, **7**, 3297–3305.
- 14 M. Dolg, H. Stoll, A. Savin and H. Preuss, *Theor Chim Acta*, 1989, **75**, 173–194.
- 15 J. Tomasi, B. Mennucci and R. Cammi, *Chem Rev*, 2005, **105**, 2999–3093.
- 16 M. Regueiro-Figueroa and C. Platas-Iglesias, *J. Phys. Chem. A*, 2015, **119**, 6436–6445.
- 17 F. Neese, *Wiley Interdiscip. Rev. Comput. Mol. Sci.*, 2012, **2**, 73–78.
- 18 F. Neese, *Wiley Interdiscip. Rev. Comput. Mol. Sci.*, 2018, **8**, e1327.
- 19 J. Tao, J. P. Perdew, V. N. Staroverov and G. E. Scuseria, *Phys. Rev. Lett.*, 2003, **91**, 146401.
- 20 E. Brémond and C. Adamo, *J. Chem. Phys.*, 2011, **135**, 024106.
- 21 E. Van Lenthe, E. J. Baerends and J. G. Snijders, *J Chem Phys*, 1994, **101**, 9783–9792.
- 22 E. Van Lenthe, E. J. Baerends and J. G. Snijders, *J Chem Phys*, 1993, **99**, 4597–4610.
- 23 D. A. Pantazis, X. Y. Chen, C. R. Landis and F. Neese, *J. Chem. Theory Comput.*, 2008, **4**, 908–919.
- 24 F. Neese, *Journal of Chemical Physics*, 2005, **122**, 34107.
- 25 G. L. Stoychev, A. A. Auer and F. Neese, *J. Chem. Theory Comput.*, 2017, **13**, 554–562.
- 26 A. V. Marenich, C. J. Cramer and D. G. Truhlar, *J. Phys. Chem. B*, 2009, **113**, 6378–6396.
- 27 B. A. Heß, C. M. Marian, U. Wahlgren and O. Gropen, *Chem. Phys. Lett.*, 1996, **251**, 365–371.
